# Supplementary material for: A Synthesis of Sphagnum Litterbag Experiments: Initial Leaching Losses Bias Decomposition Rate Estimates
Source: Copernicus journal article supplement (doi:10.5194/egusphere-2024-1686), 2024-06-06
Supplement: Supplementary file 1 [file egusphere-2024-1686-supplement.pdf]

1 Supporting information to: A Synthesis of *Sphagnum*  
2 Litterbag Experiments: Initial Leaching Losses Bias  
3 Decomposition Rate Estimates

4 Henning Teickner<sup>1,2,\*</sup> Edzer Pebesma<sup>2</sup> Klaus-Holger Knorr<sup>1</sup>

5 04 June, 2024

6 **Contents**

|    |                                                                                                |           |
|----|------------------------------------------------------------------------------------------------|-----------|
| 7  | <b>S1</b> Initial leaching losses as estimated in Moore et al. (2007)                          | <b>2</b>  |
| 8  | <b>S2</b> Model equations                                                                      | <b>2</b>  |
| 9  | <b>S3</b> Estimates of $k_0$ and $\alpha$ from available litterbag data while ignoring initial |           |
| 10 | leaching losses                                                                                | <b>6</b>  |
| 11 | <b>S4</b> Difference in initial leaching loss and decomposition rate estimates be-             |           |
| 12 | tween models 1-1 and 1-2 and between models 1-3 and 1-4                                        | <b>8</b>  |
| 13 | <b>S5</b> Comparison of one-pool decomposition rates estimated while consider-                 |           |
| 14 | ing or ignoring initial leaching losses and also allowing the decomposi-                       |           |
| 15 | tion rate to decrease with decreasing remaining mass                                           | <b>10</b> |
| 16 | <b>S6</b> Prior choices and justification                                                      | <b>12</b> |
| 17 | <b>S7</b> Prior and posterior predictive checks                                                | <b>13</b> |
| 18 | <b>S8</b> Sensitivity of parameter estimates to priors and the experimental de-                |           |
| 19 | sign of litterbag experiments                                                                  | <b>15</b> |
| 20 | <b>S9</b> Further information on Bayesian data analysis                                        | <b>19</b> |
| 21 | <b>S10</b> Initial leaching losses and one-pool decomposition rates as estimated               |           |
| 22 | by all models in this study for all species and studies                                        | <b>20</b> |
| 23 | <b>S11</b> Fit of all models to the remaining masses reported in the synthesized               |           |
| 24 | litterbag studies                                                                              | <b>31</b> |

25 **S12 Litterbag experiments with bad fit under model 1-3** **32**

26 **S13 Effects of considering or ignoring initial leaching losses on decomposi-**  
27 **tion rate estimates for model 1-1 versus model 2-1 and for all species** **33**

28 **References** **33**

29 <sup>1</sup> ILÖK, Ecohydrology & Biogeochemistry Group, Institute of Landscape Ecology, University  
30 of Münster, 48149, Germany

31 <sup>2</sup> IfGI, Spatiotemporal Modelling Lab, Institute for Geoinformatics, University of Münster,  
32 48149, Germany

33 \* Correspondence: Henning Teickner <henning.teickner@uni-muenster.de>

## 34 **S1 Initial leaching losses as estimated in Moore et al.** 35 **(2007)**

36 In Moore et al. (2007) decomposition rates are estimated from a logarithmic version of  
37 the one-pool exponential decomposition model, where the remaining mass at the start is  
38 estimated as intercept  $a$ :

$$\ln(m(t)) = a - k_0 t$$

39 Because initial leaching losses happen shortly after the start of the incubation, this intercept  
40 is smaller than 100 percent of the initial mass and  $\exp(a)$  is an estimate for initial leaching  
41 losses. With data from Tab. 2 in Moore et al. (2007), initial leaching losses for *S. magellan-*  
42 *icum*, *S. fallax*, *S. capillifolium*, and *S. angustifolium* are within the range -1 to 16 percent  
43 of the initial mass. Samples in the pond had the lowest initial leaching losses (on average -1  
44 percent of the initial mass) and samples in the fen the largest (on average 3 percent of the  
45 initial mass).

## 46 **S2 Model equations**

47 Tab. S1 lists the models we computed for this study. Here, we also assign identifiers to the  
48 models to make it easier to trace parts of the supporting information back to the specific  
49 model used to compute it. In the main text, models 1-2 and 2-2 are used in section 2.4,  
50 and model 1-4 in section 2.5. Models 1-5 and 1-6 were computed for the sensitivity analysis  
51 described in section 2.5 in the main text. The other models were computed to analyze the  
52 influence of estimating  $\alpha$  from the data and the influence of including or excluding data from  
53 Bengtsson et al. (2017), as described in the main text.

Table S1: Overview of models computed in this study on synthesized litterbag data. “Decomposition equation” is the equation the models use to describe remaining masses over time for litterbag experiments. Equations for the model components are shown in supporting information S2.

| Model version | Considers $l_0$ ? | Decomposition equation | Description                                                                                                                                                                                                                                                                                      | Dataset                                                                                |
|---------------|-------------------|------------------------|--------------------------------------------------------------------------------------------------------------------------------------------------------------------------------------------------------------------------------------------------------------------------------------------------|----------------------------------------------------------------------------------------|
| model 1-1     | Yes               | 3                      | One-pool exponential decomposition model which estimates decomposition rates and initial leaching losses. The model is a hierarchical model and estimates decomposition rates and initial leaching losses for individual litterbag replicates, combinations of species and studies, and species. | Full dataset.                                                                          |
| model 1-2     | Yes               | 3                      | Same as model 1-1.                                                                                                                                                                                                                                                                               | Full dataset excluding data from Bengtsson et al. (2017).                              |
| model 1-3     | Yes               | 5                      | Same as model 1-1, but uses equation 5.                                                                                                                                                                                                                                                          | Full dataset.                                                                          |
| model 1-4     | Yes               | 5                      | Same as model 1-3.                                                                                                                                                                                                                                                                               | Full dataset excluding data from Bengtsson et al. (2017).                              |
| model 1-5     | Yes               | 5                      | Same as model 1-3.                                                                                                                                                                                                                                                                               | Simulated data.                                                                        |
| model 1-6     | Yes               | 5                      | Same as model 1-3.                                                                                                                                                                                                                                                                               | Simulated data, created with parameter values sampled from the posterior of model 1-4. |
| model 2-1     | No                | 2                      | Same as model 1-1, but ignores initial leaching losses.                                                                                                                                                                                                                                          | Full dataset.                                                                          |
| model 2-2     | No                | 2                      | Same as model 2-1.                                                                                                                                                                                                                                                                               | Full dataset, excluding data from Bengtsson et al. (2017).                             |
| model 2-3     | No                | 4                      | Same as model 2-1, but uses equation 4.                                                                                                                                                                                                                                                          | Full dataset.                                                                          |
| model 2-4     | No                | 4                      | Same as model 2-3.                                                                                                                                                                                                                                                                               | Full dataset, excluding data from Bengtsson et al. (2017).                             |

54 All models used the following components to model the remaining mass of litterbag replicate  
55  $i$  conditional on the average remaining mass ( $\mu_i$ ), the precision of remaining masses ( $\phi_i$ ),  
56 and decomposition rates ( $k_{-1_i}$ ):

$$\begin{aligned}
m_i &\sim \text{Beta}(\mu_i \phi_i, (1 - \mu_i) \phi_i) \\
\phi_i &= \begin{cases} \text{precision}_i & \text{if precision}_i \text{ is available} \\ \phi_{-1_i} & \text{otherwise} \end{cases} \\
\phi_{-1_i} &= \phi_{-2_{\text{sample}[i]}} \\
\text{precision}_i &\sim \text{Gamma} \left( \phi_{-2\_p1}, \frac{\phi_{-2\_p1}}{\phi_{-2\_p2_{\text{sample}}}} \right) \\
\phi_{-2_{\text{sample}}} &\sim \text{Gamma} \left( \phi_{-2\_p1}, \frac{\phi_{-2\_p1}}{\phi_{-2\_p2_{\text{sample}}}} \right) \\
\phi_{-2\_p2_{\text{sample}}} &= \exp(\phi_{-2\_p2\_p1} + \phi_{-2\_p2\_p2_{\text{species}[\text{sample}]} + \\
&\quad \phi_{-2\_p2\_p3_{\text{species} \times \text{studies}[\text{sample}]}}) \\
\phi_{-2\_p2\_p1} &\sim \text{Normal}(\phi_{-2\_p2\_p1\_p1}, \phi_{-2\_p2\_p1\_p2}) \\
\phi_{-2\_p2\_p2_{\text{species}}} &\sim \text{Normal}(\phi_{-2\_p2\_p2\_p1}, \phi_{-2\_p2\_p2\_p2}) \\
\phi_{-2\_p2\_p3_{\text{species} \times \text{studies}}} &\sim \text{Normal}(\phi_{-2\_p2\_p3\_p1}, \phi_{-2\_p2\_p3\_p2}) \\
\phi_{-2\_p1} &\sim \text{Gamma}(\phi_{-2\_p1\_p1}, \phi_{-2\_p1\_p2}) \\
\phi_{-2\_p2\_p1\_p2} &\sim \text{Normal}^+(0, \phi_{-2\_p2\_p1\_p2\_p1}) \\
\phi_{-2\_p2\_p2\_p2_{\text{species}}} &\sim \text{Normal}^+(0, \phi_{-2\_p2\_p2\_p2\_p1}) \\
\phi_{-2\_p2\_p3\_p2_{\text{species} \times \text{studies}}} &\sim \text{Normal}^+(0, \phi_{-2\_p2\_p3\_p2\_p1}) \\
\phi_{-2\_p2\_p4\_p2_{\text{samples}}} &\sim \text{Normal}^+(0, \phi_{-2\_p2\_p4\_p2\_p1}) \\
k_{-1_i} &= k_{-2_{\text{sample}[i]}} \\
k_{-2_{\text{sample}}} &= \exp(k_{-2\_p1} + k_{-2\_p2_{\text{species}[\text{sample}]} + \\
&\quad k_{-2\_p3_{\text{species} \times \text{study}[\text{sample}]} + \\
&\quad k_{-2\_p4_{\text{samples}}}) \\
k_{-2\_p1} &\sim \text{Normal}(k_{-2\_p1\_p1}, k_{-2\_p1\_p2}) \\
k_{-2\_p2_{\text{species}}} &\sim \text{Normal}(k_{-2\_p2\_p1}, k_{-2\_p2\_p2}) \\
k_{-2\_p3_{\text{species} \times \text{studies}}} &\sim \text{Normal}(k_{-2\_p3\_p1}, k_{-2\_p3\_p2}) \\
k_{-2\_p4_{\text{samples}}} &\sim \text{Normal}(k_{-2\_p3\_p1}, k_{-2\_p3\_p2}) \\
k_{-2\_p1\_p2} &\sim \text{Normal}^+(0, k_{-2\_p1\_p2\_p1}) \\
k_{-2\_p2\_p2_{\text{species}}} &\sim \text{Normal}^+(0, k_{-2\_p2\_p2\_p1}) \\
k_{-2\_p3\_p2_{\text{species} \times \text{studies}}} &\sim \text{Normal}^+(0, k_{-2\_p3\_p2\_p1}) \\
k_{-2\_p4\_p2_{\text{samples}}} &\sim \text{Normal}^+(0, k_{-2\_p4\_p2\_p1})
\end{aligned} \tag{S1}$$

57 Where  $\mu_i$  is the average mass remaining for sample  $i$ ,  $\sigma_i$  is the reported standard deviation  
58 for the mass remaining for sample  $i$ , and  $\text{precision}_i = \frac{\mu_i(1-\mu_i)}{\sigma_i^2} - 1$ .

59 The formula for the average remaining mass ( $\mu_i$ ) when  $\alpha = 1$  and there are no initial leaching  
60 losses (models 2-1 and 2-2), according to equation 2 in the main text, are:

$$\mu_i = 1 \exp(kt) \quad (\text{S2})$$

61 The formula for the average remaining mass ( $\mu_i$ ) when  $\alpha = 1$  and there are initial leaching  
62 losses (models 1-1 and 1-2), according to equation 3 in the main text, are:

$$\mu_i = \begin{cases} 1 & \text{if } t_i = 0 \\ (1 - l_{-1_i}) \exp(kt) & \text{if } t_i > 0 \end{cases} \quad (\text{S3})$$

63 The formula for the average remaining mass ( $\mu_i$ ) when  $\alpha$  is estimated from the litterbag  
64 data and there are no initial leaching losses (models 2-3 and 2-4), according to equation 4  
65 in the main text, are:

$$\mu_i = \frac{(1)}{(1 + (\alpha - 1)kt)^{\frac{1}{\alpha-1}}} \quad (\text{S4})$$

66 The formula for the average remaining mass ( $\mu_i$ ) when  $\alpha$  is estimated from the litterbag  
67 data and there are initial leaching losses (models 1-3, 1-4), according to equation 5 in the  
68 main text, are:

$$\mu_i = \begin{cases} 1 & \text{if } t_i = 0 \\ \frac{(1-l_{-1_i})}{(1+(\alpha-1)kt)^{\frac{1}{\alpha-1}}} & \text{if } t_i > 0 \end{cases} \quad (\text{S5})$$

69 To avoid  $\mu_i = 1$ , we subtracted a constant ( $10^{-4}$ ) from  $\mu_i$  when  $\mu_i = 1$ .  
70  $\alpha$  is modeled in the same way as  $\phi$  (models 1-3, 1-4, 2-3, 2-4):

$$\begin{aligned}
\alpha_{1_i} &= \alpha_{2_{\text{sample}[i]}} \\
\alpha_{2_{\text{sample}}} &= 1 + \exp(\alpha_{2\_p1} + \alpha_{2\_p2_{\text{species}[\text{sample}]} + \\
&\quad \alpha_{2\_p3_{\text{species} \times \text{study}[\text{sample}]} + \\
&\quad \alpha_{2\_p4_{\text{samples}}}) \\
\alpha_{2\_p1} &\sim \text{Normal}(\alpha_{2\_p1\_p1}, \alpha_{2\_p1\_p2}) \\
\alpha_{2\_p2_{\text{species}}} &\sim \text{Normal}(\alpha_{2\_p2\_p1}, \alpha_{2\_p2\_p2}) \\
\alpha_{2\_p3_{\text{species} \times \text{studies}}} &\sim \text{Normal}(\alpha_{2\_p3\_p1}, \alpha_{2\_p3\_p2}) \\
\alpha_{2\_p4_{\text{samples}}} &\sim \text{Normal}(\alpha_{2\_p3\_p1}, \alpha_{2\_p3\_p2})
\end{aligned} \tag{S6}$$

71 Initial leaching losses are modeled in the same way as  $\phi$  (models 1-3, 1-4):

$$\begin{aligned}
l_{1_i} &= l_{2_{\text{sample}[i]}} \\
l_{2_{\text{sample}}} &= \text{inv\_logit}(l_{2\_p1} + l_{2\_p2_{\text{species}[\text{sample}]} + \\
&\quad l_{2\_p3_{\text{species} \times \text{study}[\text{sample}]} + \\
&\quad l_{2\_p4_{\text{samples}}}) \\
l_{2\_p1} &\sim \text{Normal}(l_{2\_p1\_p1}, l_{2\_p1\_p2}) \\
l_{2\_p2_{\text{species}}} &\sim \text{Normal}(l_{2\_p2\_p1}, l_{2\_p2\_p2}) \\
l_{2\_p3_{\text{species} \times \text{study}}} &\sim \text{Normal}(l_{2\_p3\_p1}, l_{2\_p3\_p2}) \\
l_{2\_p4_{\text{samples}}} &\sim \text{Normal}(l_{2\_p4\_p1}, l_{2\_p4\_p2}) \\
l_{2\_p1\_p2} &\sim \text{Normal}^+(0, l_{2\_p1\_p2\_p1}) \\
l_{2\_p2\_p2_{\text{species}}} &\sim \text{Normal}^+(0, l_{2\_p2\_p2\_p1}) \\
l_{2\_p3\_p2_{\text{species} \times \text{study}}} &\sim \text{Normal}^+(0, l_{2\_p3\_p2\_p1}) \\
l_{2\_p4\_p2_{\text{samples}}} &\sim \text{Normal}^+(0, l_{2\_p4\_p2\_p1})
\end{aligned} \tag{S7}$$

### 72 **S3 Estimates of $k_0$ and $\alpha$ from available litterbag data** 73 **while ignoring initial leaching losses**

74 In the main text (section 2.1) we mentioned that estimating  $\alpha$  from the litterbag data while  
75 ignoring initial leaching losses causes even larger bias of  $k_0$  estimates than when  $\alpha$  is set to  
76 1. Here, we present additional analyses to support this claim.

77 When equation 5 in the main text is used to estimate one-pool decomposition rates from  
78 litterbag experiments with large initial mass losses as caused by initial leaching, estimates  
79 for  $k_0$  and  $\alpha$  are much larger, indicating that under these conditions parameters intended to  
80 describe how decomposition rates decrease over time incorporate the effect of mass losses due

81 to initial leaching. Fig. S1 shows estimates for decomposition rates and  $\alpha$  for the available  
 82 litterbag data and Fig. S2 shows the same when data from Bengtsson et al. (2017) are  
 83 excuded.

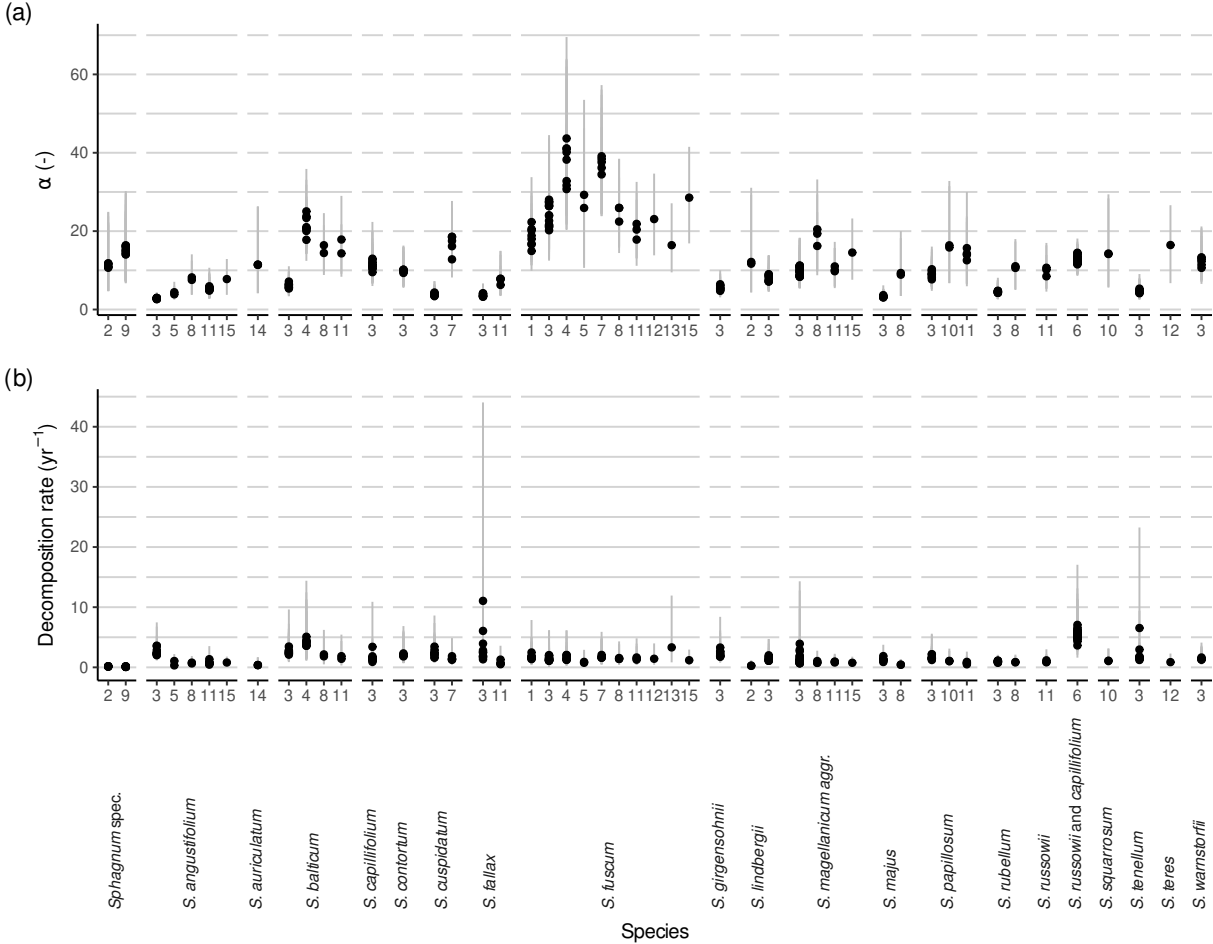

Figure S1: Estimated parameter controlling a decrease of decomposition rates over time ( $\alpha$ ) (a), and decomposition rates (b) grouped by species and study for model 2-3. Points represent averages and error bars 95% confidence intervals. The study is indicated by numbers on the x axis: (1) Asada and Warner (2005), (2) Bartsch and Moore (1985), (3) Bengtsson et al. (2017), (4) Breeuwer et al. (2008), (5) Golovatskaya and Nikonova (2017), (6) Hagemann and Moroni (2015), (7) Johnson and Damman (1991), (8) Mäkilä et al. (2018), (9) Prevost et al. (1997), (10) Scheffer et al. (2001), (11) Straková et al. (2010), (12) Szumigalski and Bayley (1996), (13) Thormann et al. (2001), (14) Trinder et al. (2008), (15) Vitt (1990). *Sphagnum spec.* are samples that have been identified only to the genus level.

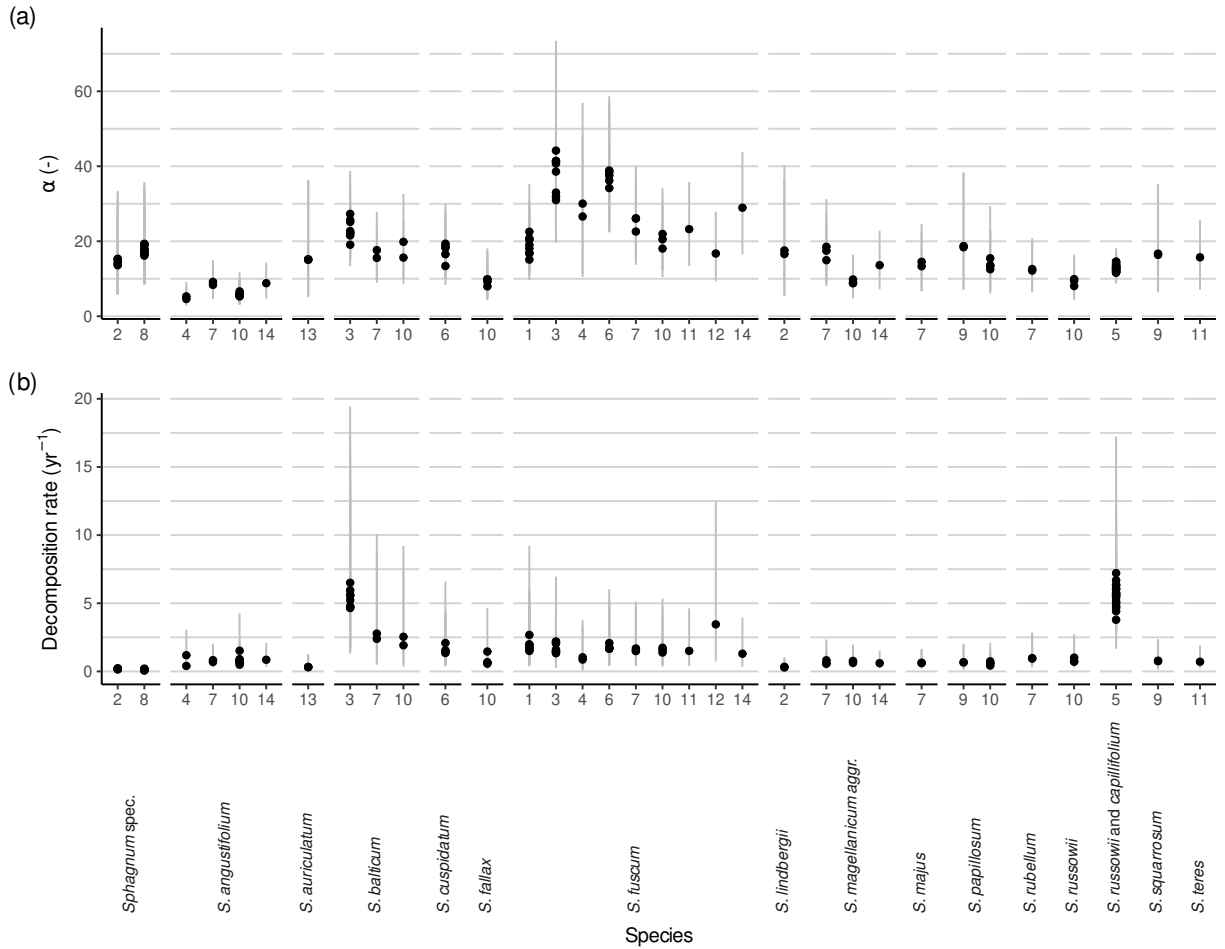

Figure S2: Estimated parameter controlling a decrease of decomposition rates over time ( $\alpha$ ) (a), and decomposition rates (b) grouped by species and study for model 2-4. Points represent averages and error bars 95% confidence intervals. The study is indicated by numbers on the x axis: (1) Asada and Warner (2005), (2) Bartsch and Moore (1985), (3) Breuwer et al. (2008), (4) Golovatskaya and Nikonova (2017), (5) Hagemann and Moroni (2015), (6) Johnson and Damman (1991), (7) Mäkilä et al. (2018), (8) Prevost et al. (1997), (9) Scheffer et al. (2001), (10) Straková et al. (2010), (11) Szumigalski and Bayley (1996), (12) Thormann et al. (2001), (13) Trinder et al. (2008), (14) Vitt (1990). *Sphagnum spec.* are samples that have been identified only to the genus level.

84 **S4 Difference in initial leaching loss and decomposition**  
 85 **rate estimates between models 1-1 and 1-2 and be-**  
 86 **tween models 1-3 and 1-4**

87 Here, we compare estimated initial leaching losses and decomposition rates for all other  
 88 samples when data from Bengtsson et al. (2017) are included (models 1-1 and 1-3) or not



89 included (model 1-2 and 1-4).

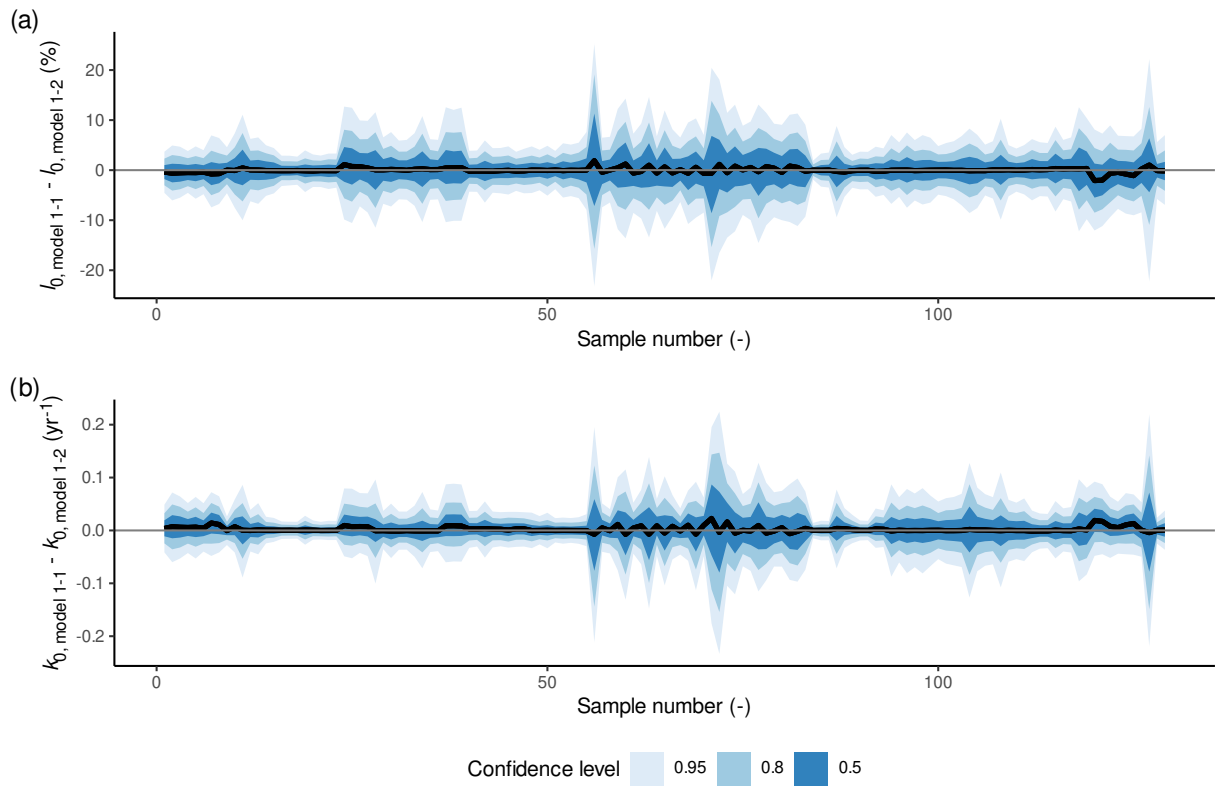

Figure S3: Difference in initial leaching losses (a) and decomposition rate (b) between model 1-1 and model 1-2 for all samples except from Bengtsson et al. (2017).

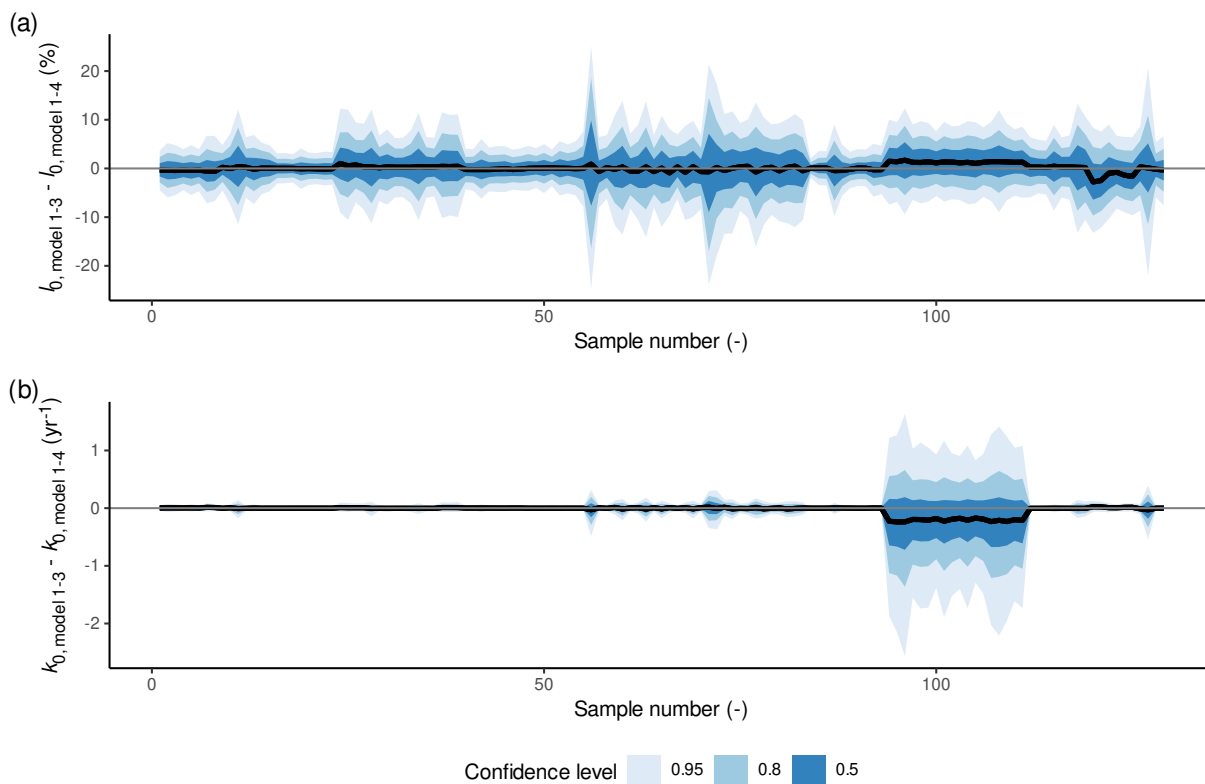

Figure S4: Difference in initial leaching losses (a) and decomposition rate (b) between model 1-3 and model 1-4 for all samples except from Bengtsson et al. (2017).

90 **S5 Comparison of one-pool decomposition rates esti-**  
 91 **imated while considering or ignoring initial leaching**  
 92 **losses and also allowing the decomposition rate to**  
 93 **decrease with decreasing remaining mass**

94 In section 3.3 in the main text, we have compared one-pool decomposition rate estimates and  
 95 their uncertainties between a model which considers initial leaching losses (model 1-1) and  
 96 a model which ignores initial leaching losses (model 2-1). Both of these models assume that  
 97 the decomposition rate remains constant over time, whereas this may in reality not be the  
 98 case. We therefore repeated the analysis using two models which allow the decomposition  
 99 rate to decrease over time (see last paragraph in section 2.1 in the main text, models 1-3  
 100 and 2-3).

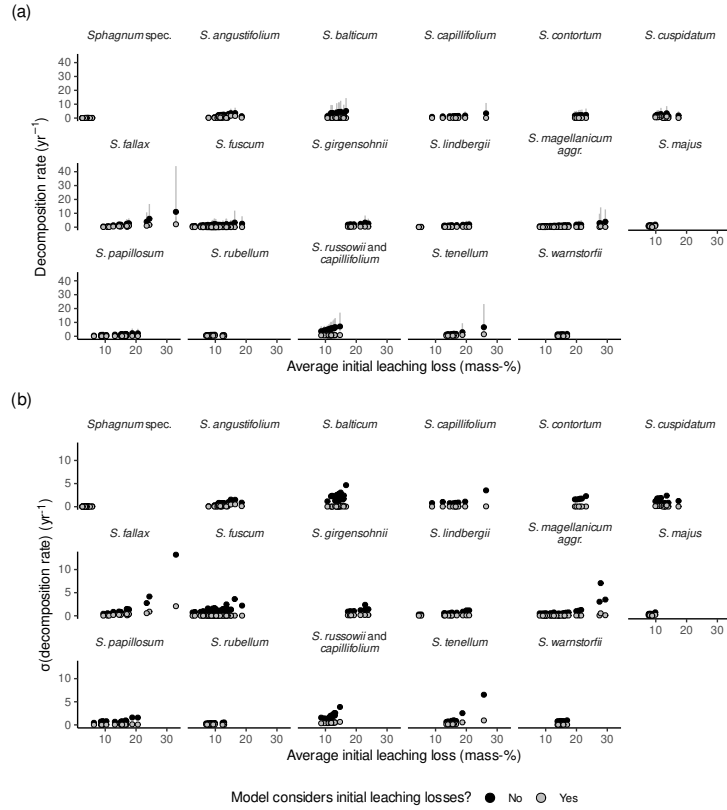

Figure S5: (a) Decomposition rate estimates, either considering leaching (black) or ignoring leaching (grey) versus average initial leaching losses estimated by the model considering initial leaching losses. Points are average estimates and error bars are 95% prediction intervals. (b) Standard deviation of decomposition rate estimates, either considering leaching (black) or ignoring leaching (grey) versus average initial leaching losses estimated by the model considering initial leaching losses. Compare with Fig. 5 in the main text.

## S6 Prior choices and justification

Table S2: Prior distributions of all Bayesian models and their justifications. “HPM parameter” is the name of the corresponding parameter in the Holocene Peatland Model (Froking et al., 2010). When there is no value for “Justification”, the prior was chosen based on prior predictive checks against the data. This prior predictive check tests whether the models can produce distributions of measured variables we expect based on prior knowledge.

| Parameter      | Unit                                    | Prior distribution        | Justification                                                                                                                                            |
|----------------|-----------------------------------------|---------------------------|----------------------------------------------------------------------------------------------------------------------------------------------------------|
| l_2_p1         | (g $g_{\text{initial}}$ ) (logit scale) | normal(-3.5, l_2_p1_p2)   | Assumes an average initial leaching loss across all available litterbag data within (95% confidence interval) (0.012, 0.066) g $g_{\text{initial}}^{-1}$ |
| l_2_p2         | (g $g_{\text{initial}}$ ) (logit scale) | normal(0, l_2_p2_p2)      |                                                                                                                                                          |
| l_2_p3         | (g $g_{\text{initial}}$ ) (logit scale) | normal(0, l_2_p3_p2)      |                                                                                                                                                          |
| l_2_p4         | (g $g_{\text{initial}}$ ) (logit scale) | normal(0, l_2_p4_p2)      |                                                                                                                                                          |
| k_2_p1         | (yr <sup>-1</sup> ) (log scale)         | normal(-2.9, k_2_p1_p2)   | Assumes an average initial decomposition rate across all available litterbag data within (95% confidence interval) (0.023, 0.129) yr <sup>-1</sup>       |
| k_2_p2         | (yr <sup>-1</sup> ) (log scale)         | normal(0, k_2_p2_p2)      |                                                                                                                                                          |
| k_2_p3         | (yr <sup>-1</sup> ) (log scale)         | normal(0, k_2_p3_p2)      |                                                                                                                                                          |
| k_2_p4         | (yr <sup>-1</sup> ) (log scale)         | normal(0, k_2_p4_p2)      |                                                                                                                                                          |
| phi_2_p2_p1    | (-) (log scale)                         | normal(5, phi_2_p2_p1_p2) |                                                                                                                                                          |
| phi_2_p2_p2    | (-) (log scale)                         | normal(0, phi_2_p2_p2_p2) |                                                                                                                                                          |
| phi_2_p2_p3    | (-) (log scale)                         | normal(0, phi_2_p2_p3_p2) |                                                                                                                                                          |
| phi_2_p2_p4    | (-) (log scale)                         | normal(0, phi_2_p2_p4_p2) |                                                                                                                                                          |
| alpha_2_p1     | (-) (log scale)                         | normal(-0.2, 0.3)         | Assumes an average $\alpha$ across all available litterbag data within (95% confidence interval) (1.458, 2.468)                                          |
| alpha_2_p2     | (-) (log scale)                         | normal(0, 0.3)            |                                                                                                                                                          |
| alpha_2_p3     | (-) (log scale)                         | normal(0, 0.3)            |                                                                                                                                                          |
| alpha_2_p4     | (-) (log scale)                         | normal(0, 0.2)            |                                                                                                                                                          |
| k_2_p1_p2      | (yr <sup>-1</sup> ) (log scale)         | half-normal(0, 0.4)       |                                                                                                                                                          |
| k_2_p2_p2      | (yr <sup>-1</sup> ) (log scale)         | half-normal(0, 0.4)       |                                                                                                                                                          |
| k_2_p3_p2      | (yr <sup>-1</sup> ) (log scale)         | half-normal(0, 0.4)       |                                                                                                                                                          |
| k_2_p4_p2      | (yr <sup>-1</sup> ) (log scale)         | half-normal(0, 0.4)       |                                                                                                                                                          |
| phi_2_p2_p1_p2 | (-) (log scale)                         | half-normal(0, 0.3)       |                                                                                                                                                          |
| phi_2_p2_p2_p2 | (-) (log scale)                         | half-normal(0, 0.3)       |                                                                                                                                                          |
| phi_2_p2_p3_p2 | (-) (log scale)                         | half-normal(0, 0.3)       |                                                                                                                                                          |
| phi_2_p2_p4_p2 | (-) (log scale)                         | half-normal(0, 0.3)       |                                                                                                                                                          |
| l_2_p1_p2      | (g $g_{\text{initial}}$ ) (logit scale) | half-normal(0, 0.4)       |                                                                                                                                                          |
| l_2_p2_p2      | (g $g_{\text{initial}}$ ) (logit scale) | half-normal(0, 0.4)       |                                                                                                                                                          |
| l_2_p3_p2      | (g $g_{\text{initial}}$ ) (logit scale) | half-normal(0, 0.4)       |                                                                                                                                                          |
| l_2_p4_p2      | (g $g_{\text{initial}}$ ) (logit scale) | half-normal(0, 0.4)       |                                                                                                                                                          |

## S7 Prior and posterior predictive checks

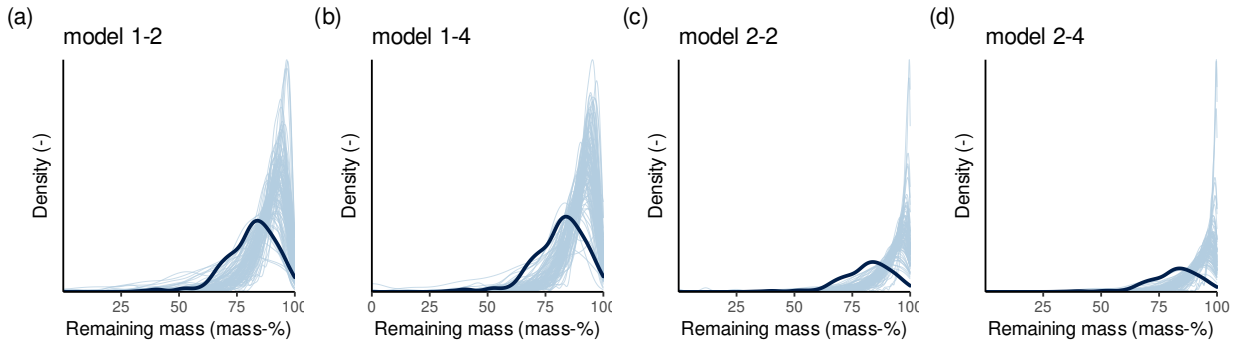

Figure S6: Density estimate of 100 sets of remaining masses sampled from the prior distribution of each model (light blue lines) versus density estimate of the measured remaining masses from the litterbag studies.

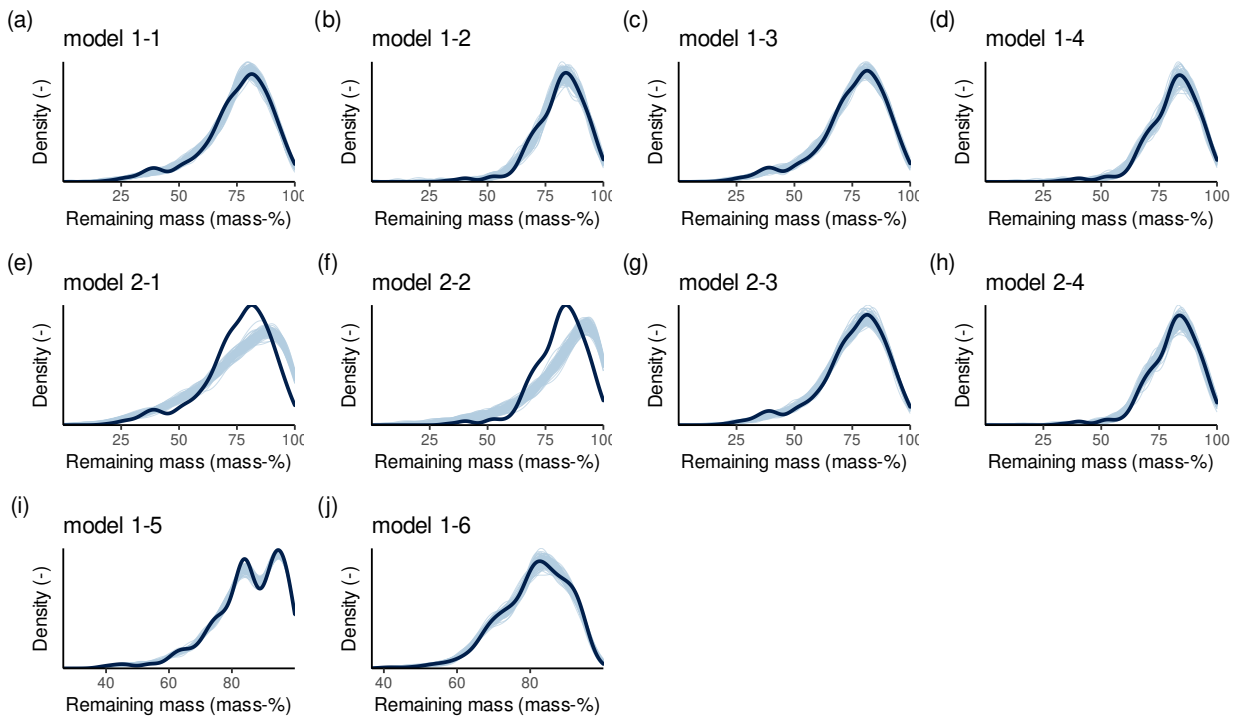

Figure S7: Density estimate of 100 sets of remaining masses sampled from the posterior distribution of each model (light blue lines) versus density estimate of the measured remaining masses from the litterbag studies.

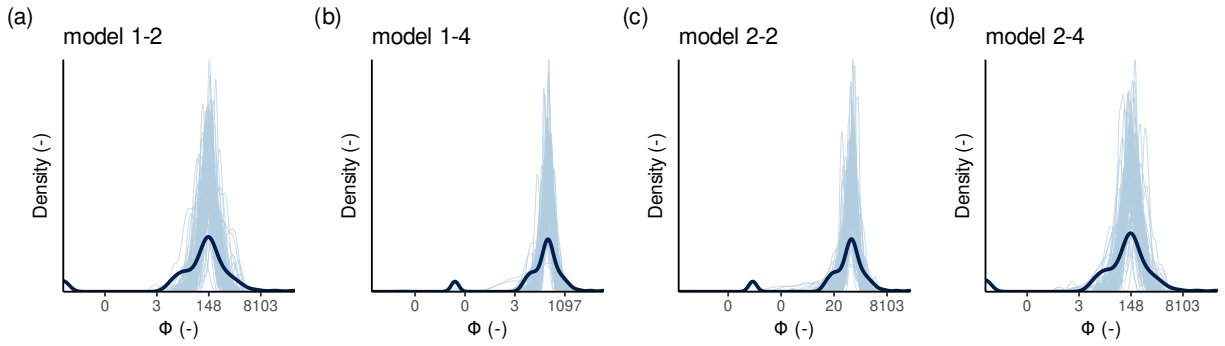

Figure S8: Density estimate of 100 sets of remaining mass errors (converted to precision) sampled from the prior distribution of each model (light blue lines) versus density estimate of the measured remaining masses from the litterbag studies. The x axis is log scaled.

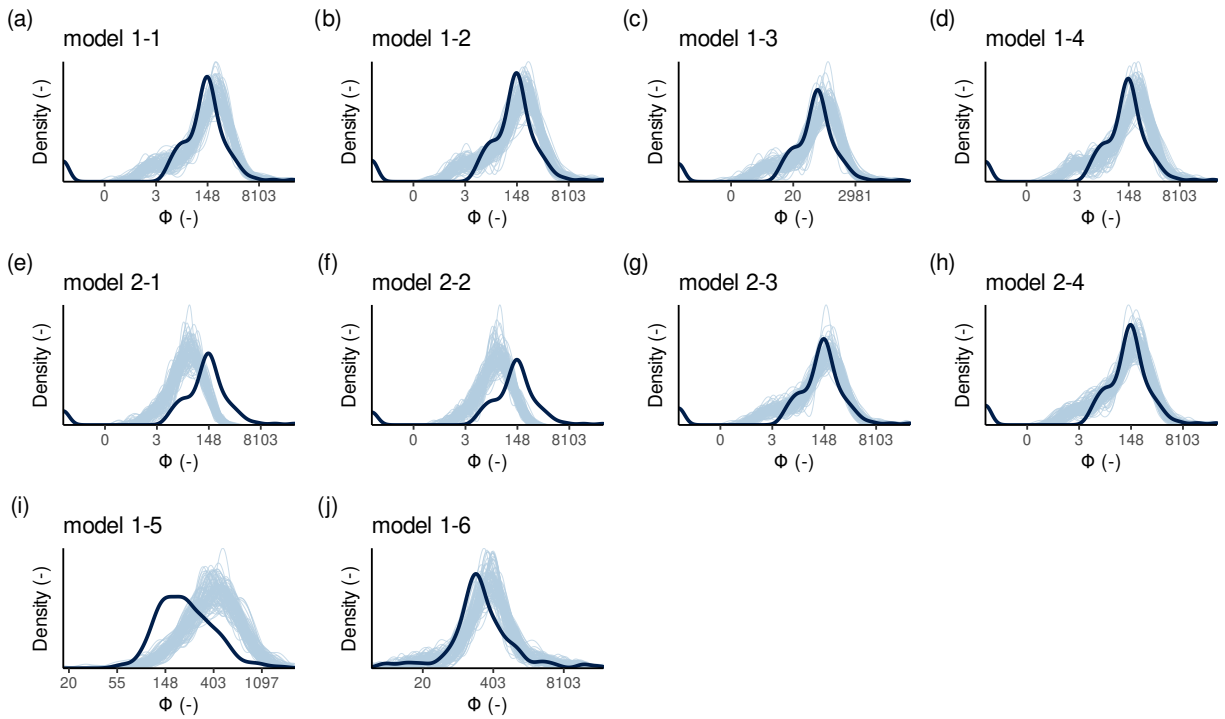

Figure S9: Density estimate of 100 sets of remaining mass errors (converted to precision) sampled from the posterior distribution of each model (light blue lines) versus density estimate of the measured remaining masses from the litterbag studies. The x axis is log scaled.

## S8 Sensitivity of parameter estimates to priors and the experimental design of litterbag experiments

To check that the model considering initial leaching losses can in principle correctly estimate parameter values for  $l_0$ ,  $k_0$ , and  $\alpha$  under conditions which resemble those in available litterbag experiments, we simulated a dataset with all combinations of different values for these parameters ( $l_0$ : 1, 5, or 15 mass-%,  $k_0$ : 0.01, 0.05, or 0.15 yr<sup>-1</sup>,  $\alpha$ : 1 or 3, and constant precision parameter for remaining masses of 200 (near the median precision estimated by the model in the main text when excluding data from Bengtsson et al. (2017), 241), implying standard deviations for remaining masses of 0.7 to 3.5 mass-%). From this, we simulated remaining masses according to three litterbag designs which differ in the time points at which litterbags are collected after the incubation started (collection plan) (design 1: after 1 and 2 years, design 2: after ~ 20 days, 1, and 2 years, design 3: after ~ 20 days, 1, 2, 3, and 5 years) and the number of litterbags collected at each time point (5 or 10, for each collection plan).

We then used the same hierarchical Bayesian model as for the model in the main text (see equations 6 and 7 and supporting information S2) and estimated parameters for the simulated data (model 1-5, Tab. S1), treating samples with the same  $k_0$  and  $\alpha$  as samples from the same species, and samples with the same experimental design and  $l_0$  as samples from the same study.

The estimated parameter values for  $l_0$ ,  $k_0$ , and  $\alpha$  can be compared against the values used to simulate the data and this allowed us to (1) test whether the models can estimate the true parameter values from litterbag data if our model is a good approximation to the data generating process, if *Sphagnum* species have similar  $k_0$  and  $\alpha$  in different studies, but may vary in their  $l_0$ , (2) analyze how the true  $k_0$ ,  $l$ , and  $\alpha$  control how accurate any of these parameters can be estimated, and (3) how the litterbag design controls how accurate  $l_0$ ,  $k_0$ , and  $\alpha$  can be estimated.

To provide an additional test that the model used in the main text can in principle provide accurate estimates of  $k_0$ ,  $l_0$ ,  $\alpha$  when the simulation is as similar to available litterbag experiments as possible, we sampled parameter values from the posterior of the model in the main text and simulated remaining masses and standard deviations of remaining masses which could be observed in the available litterbag experiments if the model approximates the true data generating process. We then estimated  $k_0$ ,  $l_0$ ,  $\alpha$  based on the simulated data (model 1-6) and compared the estimates to the parameter values sampled from the model in the main text to simulate the data.

The results of this analysis indicate that all parameters except  $\alpha$  can be successfully estimated for the simulated data (figures S10 to S12). The true value for  $k_0$  and  $l_0$  is contained in central 95% posterior intervals more than 95% of the simulated litterbag experiments. Also the maximum bias (absolute difference) was comparatively small: 0.043 (0.002, 0.105) yr<sup>-1</sup> for  $k_0$  and 4.4 (0.1, 12.7) mass-% for  $l_0$ . Biases and errors for both  $k_0$  and  $l_0$  were smallest when the first litterbags were collected ca. 20 days after the start of the experiment compared to after a year. Importantly, the bias was smallest for all experimental designs

144 for the smallest true  $l_0$  indicating that small initial leaching losses are not overestimated  
 145 (supporting information S8).

146 Estimates for  $\alpha$  were always biased, except when the prior was already similar to the true  
 147 value, indicating that litterbag data provide little information about this parameter which  
 148 therefore is dominated by the prior (figure S12). In our simulations,  $\alpha$  has only a small  
 149 influence on the estimates of  $k_0$  and  $l_0$  (figures S10 and S11), indicating that also for available  
 150 litterbag data, this bias should affect our estimates for  $l_0$  and  $k_0$  not much.

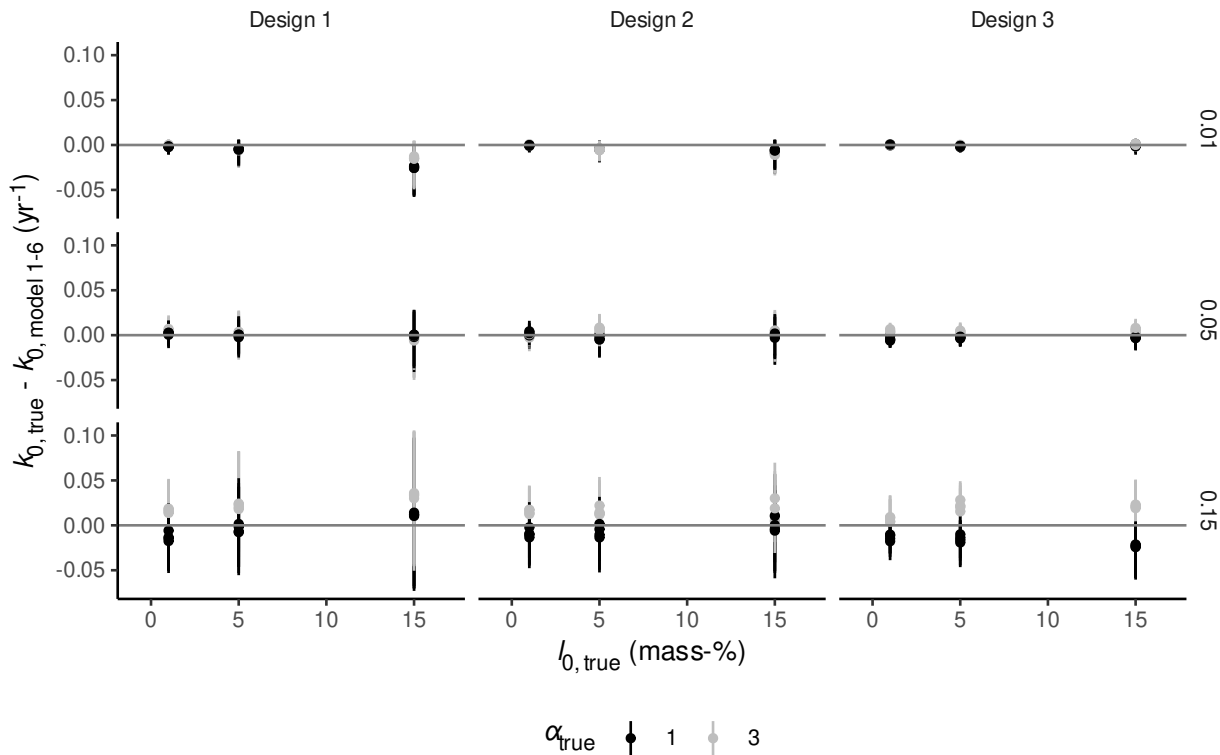

Figure S10: True decomposition rates minus estimated decomposition rates for model 1-5 versus true initial leaching losses ( $l_{0,true}$ ). Columns show values for different experimental designs (see the main text for details). Rows show values for different true decomposition rates ( $k_{0,true}$ ) ( $\text{yr}^{-1}$ ).



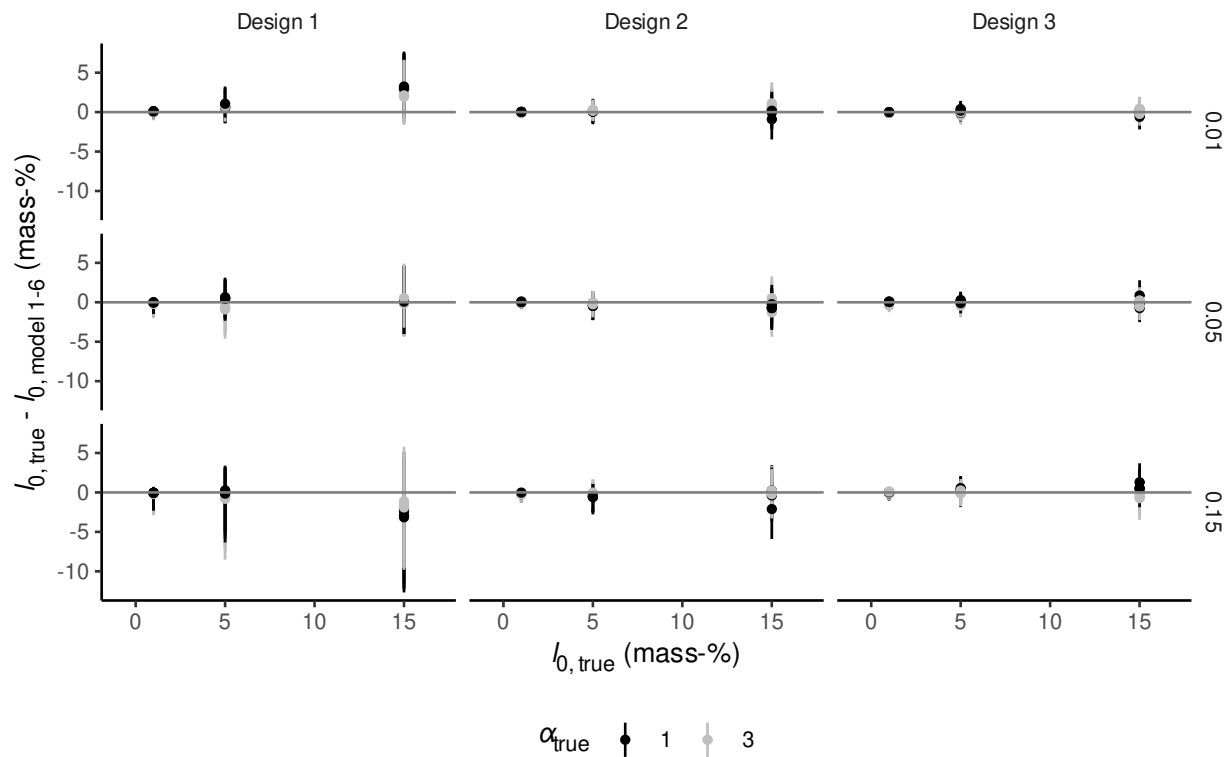

Figure S11: True initial leaching losses minus estimated initial leaching losses for model 1-5 versus true initial leaching losses ( $l_{0,\text{true}}$ ). Columns show values for different experimental designs (see the main text for details). Rows show values for different true decomposition rates ( $k_{0,\text{true}}$ ) ( $\text{yr}^{-1}$ ).

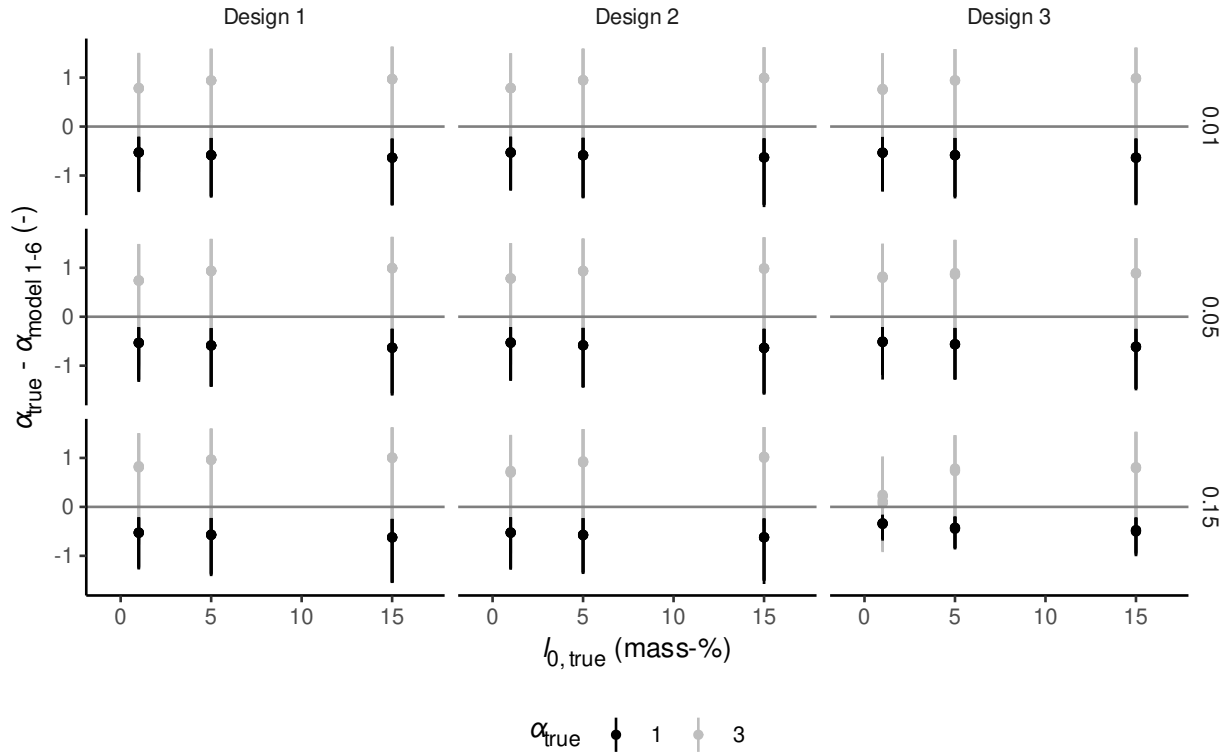

Figure S12: True  $\alpha$  minus estimated  $\alpha$  for model 1-5 versus true initial leaching losses ( $l_{0,\text{true}}$ ). Columns show values for different experimental designs (see the main text for details). Rows show values for different true decomposition rates ( $k_{0,\text{true}}$ ) ( $\text{yr}^{-1}$ ).

151 Based on these results we can assess how large the risk is that our model overestimated  $l_0$ .  
 152 If the experimental design causes available litterbag data to provide only few information  
 153 on  $l_0$  and  $k_0$ , their estimates will depend more strongly on the prior and the variability  
 154 of initial leaching losses and decomposition rates across studies and species, meaning that  
 155 uncertain estimates are constrained to the global average. In the sensitivity analysis, this  
 156 caused underestimation of larger initial leaching losses, but no overestimation of smaller  
 157 initial leaching losses for the sampling design where the first litterbags were collected only  
 158 after a year because we chose a prior which reflects that previous studies which directly  
 159 measured initial leaching losses mostly observed small initial leaching losses. Even though  
 160 this simulation is not directly transferable to the real data, the general pattern that initial  
 161 leaching losses are constrained to the estimated average still holds and thus even if the  
 162 data are not informative, our estimates should be conservative because also our prior is  
 163 conservative.

164 Moreover, for 5 experiments where the first litterbag was collected a year after the start of  
 165 the experiment, the estimated average decomposition rate was larger than  $0.03 \text{ yr}^{-1}$  and  
 166 the estimated average initial leaching loss smaller than 8 mass-%, indicating that there are  
 167 only few initial leaching loss estimates which are small. In addition, the sensitivity analysis  
 168 with data simulated from the posterior distribution of the model in the main text suggests

169 that if the posterior is an approximately correct representation of the true parameter values,  
170 estimating these parameter values from the simulated data does not result in biased estimates  
171 for  $l_0$ .

172 In contrast, the risk of underestimation of large initial leaching losses is probably larger  
173 because 42 experiments where the first litterbag was collected a year after the start of the  
174 experiment had estimates for average  $k_0$  larger than  $0.03 \text{ yr}^{-1}$  and estimates for average  $l_0$   
175 larger than 10 mass-%, indicating that underestimation of large initial leaching losses may  
176 be more common in our analysis than overestimation of small initial leaching losses.

177 Overall, even though the design of most available litterbag data introduces errors which  
178 should certainly be reduced to validate our results, we do not expect that there is a serious  
179 overestimation of small initial leaching losses and estimates of large initial leaching losses  
180 may be conservative.

## 181 **S9 Further information on Bayesian data analysis**

182 None of the models had divergent transitions, the minimum bulk effective sample size was  
183 larger than 400, and the largest improved  $\hat{R}$  was 1.01, indicating that all chains converged  
184 (Vehtari et al., 2021). Monte Carlo standard errors (MSCE) (Vehtari et al., 2021) for the  
185 median were at most  $0.081 \text{ yr}^{-1}$  for  $k_0$  (if initial leaching was considered),  $0.204 \text{ yr}^{-1}$  for  $k_0$   
186 (if initial leaching was ignored), 1.419 mass-% for  $l_0$ , 0.19 for  $\alpha$ , and 0.47 mass-% for the  
187 remaining mass. For the 2.5% and 97.5% quantiles, MCSE were at most  $0.137 \text{ yr}^{-1}$  for  $k_0$   
188 (if initial leaching was considered),  $1.267 \text{ yr}^{-1}$  for  $k_0$  (if initial leaching was ignored), 0.691  
189 mass-% for  $l_0$ , 0.701 for  $\alpha$ , and 3.044 mass-% for the remaining mass.

190 All other computations were done in R (4.2.0) (R Core Team, 2022). We computed prior  
191 and posterior predictive checks with the bayesplot package (1.9.0) (Gabry and Mahr, 2022)  
192 (supporting section S7). Data were handled with tidyverse packages (Wickham et al., 2019),  
193 MCMC samples with the posterior (1.5.0) (Bürkner et al., 2023) and tidybayes (3.0.2) (Kay,  
194 2022) packages. Graphics were created with ggplot2 (3.4.4) (Wickham, 2016) and patchwork  
195 (1.1.1) (Pedersen, 2020).

196 **S10 Initial leaching losses and one-pool decomposition**  
197 **rates as estimated by all models in this study for**  
198 **all species and studies**

Table S3: Range of average estimated initial leaching losses (percent of the initial mass) for litterbag replicates grouped by species and study as estimated by all models (see Tab. S1). Ranges were computed on average estimates and therefore do not consider the uncertainty of initial leaching losses for individual litterbag replicates.

| Taxon                                       | Study                            | Sample size | Initial leaching losses (mass-%) |              |              |              |           |           |           |           |
|---------------------------------------------|----------------------------------|-------------|----------------------------------|--------------|--------------|--------------|-----------|-----------|-----------|-----------|
|                                             |                                  |             | model 1-1                        | model 1-2    | model 1-3    | model 1-4    | model 2-1 | model 2-2 | model 2-3 | model 2-4 |
| <i>S. angustifolium</i>                     | Bengtsson et al. (2017)          | 10          | 17.8, 28.9                       |              | 10.96, 16.42 |              |           |           |           |           |
|                                             | Golovatskaya and Nikonova (2017) | 2           | 10.11, 14.88                     | 9.95, 14.04  | 7.8, 11.61   | 7.57, 11.72  |           |           |           |           |
|                                             | Mäkilä et al. (2018)             | 2           | 14.1, 16.29                      | 13.73, 16.05 | 11.76, 13.55 | 11.66, 13.4  |           |           |           |           |
|                                             | Straková et al. (2010)           | 9           | 11.45, 22.53                     | 10.92, 20.71 | 9.71, 18.55  | 9.56, 17.65  |           |           |           |           |
|                                             | Vitt (1990)                      | 1           | 16.33, 16.33                     | 15.79, 15.79 | 13.93, 13.93 | 13.52, 13.52 |           |           |           |           |
| <i>S. auriculatum</i>                       | Trinder et al. (2008)            | 3           | 5.77, 6.03                       | 5.15, 5.37   | 5.52, 5.79   | 5.01, 5.22   |           |           |           |           |
| <i>S. balticum</i>                          | Bengtsson et al. (2017)          | 9           | 15.26, 18.97                     |              | 13.18, 15.96 |              |           |           |           |           |
|                                             | Breeuwer et al. (2008)           | 8           | 11.99, 16.89                     | 12.02, 17.08 | 11.81, 16.69 | 11.88, 16.88 |           |           |           |           |
|                                             | Mäkilä et al. (2018)             | 2           | 14.28, 16.72                     | 14.72, 17.26 | 13.54, 15.89 | 14.31, 16.8  |           |           |           |           |
|                                             | Straková et al. (2010)           | 2           | 11.21, 14.81                     | 11.69, 15.38 | 10.64, 14    | 11.32, 14.91 |           |           |           |           |
| <i>S. capillifolium</i>                     | Bengtsson et al. (2017)          | 10          | 9.15, 27.38                      |              | 8.85, 26.39  |              |           |           |           |           |
| <i>S. contortum</i>                         | Bengtsson et al. (2017)          | 6           | 19.93, 23.61                     |              | 19.5, 23.09  |              |           |           |           |           |
| <i>S. cuspidatum</i>                        | Bengtsson et al. (2017)          | 10          | 11.86, 18.62                     |              | 9.89, 13.53  |              |           |           |           |           |
|                                             | Johnson and Damman (1991)        | 5           | 12.66, 17.94                     | 12.87, 18.2  | 12.32, 17.38 | 12.57, 17.82 |           |           |           |           |
| <i>S. fallax</i>                            | Bengtsson et al. (2017)          | 10          | 16.99, 50.6                      |              | 12.62, 32.95 |              |           |           |           |           |
|                                             | Straková et al. (2010)           | 4           | 10.56, 19.66                     | 11.17, 20.4  | 9.39, 17.11  | 10.2, 18.08  |           |           |           |           |
| <i>S. fuscum</i>                            | Asada and Warner (2005)          | 8           | 11.31, 18.94                     | 11.27, 18.73 | 11.05, 18.67 | 10.92, 18.28 |           |           |           |           |
|                                             | Bengtsson et al. (2017)          | 16          | 5.91, 13.8                       |              | 6.06, 13.6   |              |           |           |           |           |
|                                             | Breeuwer et al. (2008)           | 8           | 5.27, 9.8                        | 5.29, 9.87   | 5.25, 9.8    | 5.24, 9.73   |           |           |           |           |
|                                             | Golovatskaya and Nikonova (2017) | 2           | 2.34, 2.91                       | 2.44, 3.05   | 2.62, 3.36   | 2.81, 3.72   |           |           |           |           |
|                                             | Johnson and Damman (1991)        | 5           | 8.89, 10.19                      | 8.91, 10.18  | 8.87, 10.14  | 8.79, 10.08  |           |           |           |           |
|                                             | Mäkilä et al. (2018)             | 3           | 10.38, 11.69                     | 10.28, 11.53 | 10.21, 11.5  | 9.93, 11.22  |           |           |           |           |
|                                             | Straková et al. (2010)           | 3           | 10.3, 12.64                      | 10.27, 12.66 | 10.07, 12.47 | 9.86, 12.16  |           |           |           |           |
|                                             | Szumigalski and Bayley (1996)    | 1           | 10.74, 10.74                     | 10.72, 10.72 | 10.67, 10.67 | 10.41, 10.41 |           |           |           |           |
|                                             | Thormann et al. (2001)           | 1           | 16.4, 16.4                       | 16.36, 16.36 | 16.28, 16.28 | 15.97, 15.97 |           |           |           |           |
| Vitt (1990)                                 | 1                                | 8.88, 8.88  | 8.88, 8.88                       | 8.77, 8.77   | 8.57, 8.57   |              |           |           |           |           |
| <i>S. girgensohnii</i>                      | Bengtsson et al. (2017)          | 9           | 20.11, 27.77                     |              | 17.29, 23.91 |              |           |           |           |           |
| <i>S. lindbergii</i>                        | Bartsch and Moore (1985)         | 2           | 4.73, 5.54                       | 5.3, 6.16    | 4.58, 5.33   | 5.07, 5.81   |           |           |           |           |
|                                             | Bengtsson et al. (2017)          | 10          | 13.8, 22.41                      |              | 12.79, 20.9  |              |           |           |           |           |
| <i>S. magellanicum</i> <i>aggr.</i>         | Bengtsson et al. (2017)          | 27          | 8.29, 32.18                      |              | 8.06, 29.37  |              |           |           |           |           |
|                                             | Mäkilä et al. (2018)             | 3           | 9.51, 13.33                      | 9.29, 13.01  | 9.09, 12.66  | 8.81, 12.29  |           |           |           |           |
|                                             | Straková et al. (2010)           | 3           | 10.73, 12.62                     | 10.46, 12.22 | 9.88, 11.65  | 9.79, 11.33  |           |           |           |           |
|                                             | Vitt (1990)                      | 1           | 10.42, 10.42                     | 10.5, 10.5   | 9.79, 9.79   | 9.82, 9.82   |           |           |           |           |
| <i>S. majus</i>                             | Bengtsson et al. (2017)          | 8           | 9.99, 13.71                      |              | 7.69, 9.84   |              |           |           |           |           |
|                                             | Mäkilä et al. (2018)             | 2           | 9.93, 10.04                      | 10.76, 11.16 | 8.76, 8.85   | 10.1, 10.45  |           |           |           |           |
| <i>S. papillosum</i>                        | Bengtsson et al. (2017)          | 10          | 13.85, 21.76                     |              | 13.14, 20.58 |              |           |           |           |           |
|                                             | Scheffer et al. (2001)           | 2           | 8.95, 9.65                       | 8.09, 8.46   | 8.62, 9.18   | 7.8, 8.09    |           |           |           |           |
|                                             | Straková et al. (2010)           | 4           | 6.59, 10.7                       | 7.2, 11.33   | 6.33, 10.36  | 6.86, 10.94  |           |           |           |           |
| <i>S. rubellum</i>                          | Bengtsson et al. (2017)          | 10          | 7.64, 11.34                      |              | 7.02, 9.83   |              |           |           |           |           |
|                                             | Mäkilä et al. (2018)             | 2           | 13.59, 14.26                     | 15.59, 16.33 | 12.36, 12.84 | 14.8, 15.55  |           |           |           |           |
| <i>S. russowii</i>                          | Straková et al. (2010)           | 3           | 12.94, 15.78                     | 13.4, 16.24  | 11.7, 14.33  | 12.29, 15.14 |           |           |           |           |
| <i>S. russowii</i> and <i>capillifolium</i> | Hagemann and Moroni (2015)       | 18          | 15.85, 21.57                     | 15.98, 21.54 | 8.62, 14.71  | 7.56, 13.08  |           |           |           |           |
| <i>S. squarrosus</i>                        | Scheffer et al. (2001)           | 2           | 9.68, 10.08                      | 8.91, 9.61   | 9.18, 9.57   | 8.55, 9.23   |           |           |           |           |
| <i>S. tenellum</i>                          | Bengtsson et al. (2017)          | 9           | 15.18, 33.95                     |              | 13.52, 25.68 |              |           |           |           |           |
| <i>S. teres</i>                             | Szumigalski and Bayley (1996)    | 1           | 11.89, 11.89                     | 11.9, 11.9   | 11.14, 11.14 | 11.32, 11.32 |           |           |           |           |
| <i>S. warnstorffii</i>                      | Bengtsson et al. (2017)          | 6           | 14.37, 17.52                     |              | 13.84, 16.95 |              |           |           |           |           |
|                                             | Bartsch and Moore (1985)         | 6           | 3.5, 4.63                        | 3.89, 5.21   | 3.41, 4.59   | 3.71, 4.97   |           |           |           |           |
| <i>Sphagnum</i> <i>spec.</i>                | Prevost et al. (1997)            | 10          | 2.6, 5.95                        | 2.75, 6.03   | 2.56, 5.77   | 2.64, 5.68   |           |           |           |           |

Table S4: Range of average one-pool exponential decomposition rates ( $\text{yr}^{-1}$ ) for litterbag replicates grouped by species and study as estimated by all models (see Tab. S1). Ranges were computed on average estimates and therefore do not consider the uncertainty of decomposition rates for individual litterbag replicates.

| Taxon                                        | Study                            | Sample size | Decomposition rates ( $\text{yr}^{-1}$ ) |            |            |            |            |            |             |            |
|----------------------------------------------|----------------------------------|-------------|------------------------------------------|------------|------------|------------|------------|------------|-------------|------------|
|                                              |                                  |             | model 1-1                                | model 1-2  | model 1-3  | model 1-4  | model 2-1  | model 2-2  | model 2-3   | model 2-4  |
| <i>S. angustifolium</i>                      | Bengtsson et al. (2017)          | 10          | 0.59, 0.82                               |            | 0.97, 1.68 |            | 0.86, 1.17 |            | 2.02, 3.6   |            |
|                                              | Golovatskaya and Nikonova (2017) | 2           | 0.1, 0.25                                | 0.1, 0.25  | 0.14, 0.37 | 0.15, 0.41 | 0.16, 0.35 | 0.16, 0.35 | 0.32, 1.05  | 0.4, 1.19  |
|                                              | Mäkilä et al. (2018)             | 2           | 0.07, 0.08                               | 0.07, 0.08 | 0.1, 0.11  | 0.1, 0.12  | 0.18, 0.2  | 0.17, 0.19 | 0.65, 0.78  | 0.69, 0.83 |
|                                              | Straková et al. (2010)           | 9           | 0.09, 0.2                                | 0.09, 0.2  | 0.11, 0.26 | 0.13, 0.31 | 0.18, 0.33 | 0.19, 0.33 | 0.45, 1.35  | 0.49, 1.52 |
|                                              | Vitt (1990)                      | 1           | 0.06, 0.06                               | 0.06, 0.06 | 0.1, 0.1   | 0.11, 0.11 | 0.2, 0.2   | 0.19, 0.19 | 0.8, 0.8    | 0.85, 0.85 |
| <i>S. auriculatum</i>                        | Trinder et al. (2008)            | 3           | 0.05, 0.05                               | 0.04, 0.04 | 0.05, 0.05 | 0.04, 0.04 | 0.06, 0.06 | 0.05, 0.06 | 0.37, 0.39  | 0.31, 0.32 |
| <i>S. balticum</i>                           | Bengtsson et al. (2017)          | 9           | 0.24, 0.48                               |            | 0.34, 0.69 |            | 0.48, 0.71 |            | 2.11, 3.46  |            |
|                                              | Breeuwer et al. (2008)           | 8           | 0.04, 0.06                               | 0.03, 0.06 | 0.04, 0.06 | 0.04, 0.06 | 0.17, 0.2  | 0.16, 0.2  | 3.59, 5.09  | 4.65, 6.5  |
|                                              | Mäkilä et al. (2018)             | 2           | 0.05, 0.05                               | 0.04, 0.04 | 0.06, 0.06 | 0.05, 0.05 | 0.16, 0.18 | 0.15, 0.17 | 1.83, 2.15  | 2.39, 2.77 |
|                                              | Straková et al. (2010)           | 2           | 0.05, 0.06                               | 0.04, 0.05 | 0.05, 0.07 | 0.05, 0.07 | 0.14, 0.17 | 0.13, 0.16 | 1.41, 1.86  | 1.92, 2.54 |
| <i>S. capilli folium</i>                     | Bengtsson et al. (2017)          | 10          | 0.05, 0.08                               |            | 0.06, 0.1  |            | 0.15, 0.37 |            | 0.91, 3.41  |            |
| <i>S. contortum</i>                          | Bengtsson et al. (2017)          | 6           | 0.06, 0.07                               |            | 0.07, 0.08 |            | 0.32, 0.35 |            | 1.81, 2.32  |            |
| <i>S. cuspidatum</i>                         | Bengtsson et al. (2017)          | 10          | 0.39, 0.79                               |            | 0.5, 1.12  |            | 0.57, 0.96 |            | 1.61, 3.45  |            |
|                                              | Johnson and Damman (1991)        | 5           | 0.03, 0.05                               | 0.03, 0.05 | 0.03, 0.06 | 0.03, 0.06 | 0.14, 0.19 | 0.14, 0.18 | 1.25, 1.85  | 1.35, 2.08 |
| <i>S. fallax</i>                             | Bengtsson et al. (2017)          | 10          | 0.3, 0.64                                |            | 0.46, 2.09 |            | 0.55, 1.34 |            | 1.33, 11.05 |            |
|                                              | Straková et al. (2010)           | 4           | 0.07, 0.14                               | 0.06, 0.12 | 0.09, 0.2  | 0.08, 0.19 | 0.15, 0.27 | 0.14, 0.26 | 0.52, 1.28  | 0.57, 1.46 |
| <i>S. fuscum</i>                             | Asada and Warner (2005)          | 8           | 0.03, 0.05                               | 0.03, 0.05 | 0.03, 0.05 | 0.04, 0.06 | 0.12, 0.17 | 0.12, 0.17 | 1.37, 2.47  | 1.5, 2.68  |
|                                              | Bengtsson et al. (2017)          | 16          | 0.03, 0.04                               |            | 0.03, 0.05 |            | 0.08, 0.19 |            | 1.1, 2.04   |            |
|                                              | Breeuwer et al. (2008)           | 8           | 0.02, 0.03                               | 0.02, 0.03 | 0.02, 0.03 | 0.02, 0.03 | 0.08, 0.11 | 0.08, 0.11 | 1.23, 2.06  | 1.33, 2.2  |
|                                              | Golovatskaya and Nikonova (2017) | 2           | 0.03, 0.05                               | 0.03, 0.05 | 0.04, 0.05 | 0.04, 0.05 | 0.05, 0.07 | 0.05, 0.07 | 0.75, 0.91  | 0.87, 1.04 |
|                                              | Johnson and Damman (1991)        | 5           | 0.01, 0.02                               | 0.01, 0.02 | 0.01, 0.02 | 0.01, 0.02 | 0.09, 0.09 | 0.09, 0.09 | 1.59, 2.06  | 1.66, 2.08 |
|                                              | Mäkilä et al. (2018)             | 3           | 0.03, 0.03                               | 0.03, 0.03 | 0.03, 0.04 | 0.03, 0.04 | 0.11, 0.12 | 0.1, 0.12  | 1.4, 1.55   | 1.49, 1.68 |
|                                              | Straková et al. (2010)           | 3           | 0.04, 0.05                               | 0.04, 0.05 | 0.04, 0.06 | 0.04, 0.06 | 0.11, 0.14 | 0.11, 0.14 | 1.27, 1.64  | 1.38, 1.74 |
|                                              | Szumigalski and Bayley (1996)    | 1           | 0.03, 0.03                               | 0.03, 0.03 | 0.04, 0.04 | 0.04, 0.04 | 0.11, 0.11 | 0.11, 0.11 | 1.43, 1.43  | 1.51, 1.51 |
|                                              | Thormann et al. (2001)           | 1           | 0.05, 0.05                               | 0.05, 0.05 | 0.05, 0.05 | 0.06, 0.06 | 0.24, 0.24 | 0.24, 0.24 | 3.32, 3.32  | 3.45, 3.45 |
|                                              | Vitt (1990)                      | 1           | 0.03, 0.03                               | 0.03, 0.03 | 0.03, 0.03 | 0.03, 0.03 | 0.1, 0.1   | 0.09, 0.09 | 1.18, 1.18  | 1.3, 1.3   |
| <i>S. girgensohnii</i>                       | Bengtsson et al. (2017)          | 9           | 0.17, 0.41                               |            | 0.25, 0.6  |            | 0.47, 0.73 |            | 1.77, 3.29  |            |
| <i>S. lindbergii</i>                         | Bartsch and Moore (1985)         | 2           | 0.05, 0.05                               | 0.04, 0.04 | 0.05, 0.06 | 0.04, 0.05 | 0.1, 0.11  | 0.09, 0.11 | 0.25, 0.29  | 0.29, 0.34 |
|                                              | Bengtsson et al. (2017)          | 10          | 0.1, 0.16                                |            | 0.13, 0.2  |            | 0.29, 0.4  |            | 1.09, 2     |            |
| <i>S. magellanicum aggr.</i>                 | Bengtsson et al. (2017)          | 27          | 0.06, 0.3                                |            | 0.07, 0.57 |            | 0.18, 0.79 |            | 0.66, 3.92  |            |
|                                              | Mäkilä et al. (2018)             | 3           | 0.03, 0.04                               | 0.03, 0.04 | 0.03, 0.05 | 0.04, 0.05 | 0.1, 0.13  | 0.1, 0.13  | 0.74, 1.04  | 0.56, 0.82 |
|                                              | Straková et al. (2010)           | 3           | 0.08, 0.1                                | 0.08, 0.1  | 0.1, 0.12  | 0.1, 0.13  | 0.16, 0.19 | 0.16, 0.19 | 0.8, 0.95   | 0.63, 0.77 |
|                                              | Vitt (1990)                      | 1           | 0.05, 0.05                               | 0.04, 0.04 | 0.06, 0.06 | 0.05, 0.05 | 0.14, 0.14 | 0.12, 0.12 | 0.76, 0.76  | 0.6, 0.6   |
| <i>S. majus</i>                              | Bengtsson et al. (2017)          | 8           | 0.31, 0.65                               |            | 0.41, 0.91 |            | 0.48, 0.79 |            | 0.88, 1.87  |            |
|                                              | Mäkilä et al. (2018)             | 2           | 0.05, 0.06                               | 0.04, 0.05 | 0.06, 0.07 | 0.05, 0.06 | 0.13, 0.14 | 0.12, 0.13 | 0.44, 0.44  | 0.61, 0.64 |
| <i>S. papillosum</i>                         | Bengtsson et al. (2017)          | 10          | 0.1, 0.2                                 |            | 0.12, 0.24 |            | 0.29, 0.44 |            | 1.22, 2.19  |            |
|                                              | Scheffer et al. (2001)           | 2           | 0.04, 0.04                               | 0.03, 0.03 | 0.04, 0.05 | 0.03, 0.04 | 0.12, 0.12 | 0.1, 0.1   | 1.02, 1.08  | 0.66, 0.67 |
|                                              | Straková et al. (2010)           | 4           | 0.04, 0.09                               | 0.04, 0.07 | 0.05, 0.1  | 0.05, 0.08 | 0.1, 0.18  | 0.09, 0.17 | 0.5, 0.91   | 0.43, 0.74 |
| <i>S. rubellum</i>                           | Bengtsson et al. (2017)          | 10          | 0.26, 0.38                               |            | 0.31, 0.45 |            | 0.34, 0.5  |            | 0.75, 1.13  |            |
|                                              | Mäkilä et al. (2018)             | 2           | 0.05, 0.06                               | 0.04, 0.04 | 0.07, 0.07 | 0.05, 0.05 | 0.17, 0.17 | 0.15, 0.15 | 0.83, 0.88  | 0.94, 0.98 |
| <i>S. russowii</i>                           | Straková et al. (2010)           | 3           | 0.07, 0.11                               | 0.06, 0.1  | 0.08, 0.14 | 0.08, 0.13 | 0.18, 0.22 | 0.17, 0.22 | 0.85, 1.17  | 0.71, 1.01 |
| <i>S. russowii</i> and <i>capilli folium</i> | Hagemann and Moroni (2015)       | 18          | 0.1, 0.16                                | 0.1, 0.16  | 0.65, 0.85 | 0.85, 1.16 | 0.33, 0.38 | 0.33, 0.38 | 3.64, 7.06  | 3.79, 7.21 |
| <i>S. squarrosus</i>                         | Scheffer et al. (2001)           | 2           | 0.04, 0.04                               | 0.03, 0.03 | 0.05, 0.05 | 0.04, 0.04 | 0.12, 0.13 | 0.1, 0.11  | 1.07, 1.09  | 0.75, 0.79 |
| <i>S. tenellum</i>                           | Bengtsson et al. (2017)          | 9           | 0.23, 0.8                                |            | 0.29, 1.45 |            | 0.45, 1.1  |            | 1.22, 6.54  |            |
| <i>S. teres</i>                              | Szumigalski and Bayley (1996)    | 1           | 0.03, 0.03                               | 0.03, 0.03 | 0.04, 0.04 | 0.04, 0.04 | 0.13, 0.13 | 0.12, 0.12 | 0.87, 0.87  | 0.71, 0.71 |
| <i>S. warnstorffii</i>                       | Bengtsson et al. (2017)          | 6           | 0.05, 0.08                               |            | 0.06, 0.09 |            | 0.24, 0.29 |            | 1.28, 1.64  |            |
| <i>Sphagnum spec.</i>                        | Bartsch and Moore (1985)         | 6           | 0.04, 0.05                               | 0.04, 0.05 | 0.04, 0.06 | 0.04, 0.05 | 0.08, 0.11 | 0.08, 0.11 | 0.13, 0.18  | 0.15, 0.22 |
|                                              | Prevost et al. (1997)            | 10          | 0.02, 0.03                               | 0.02, 0.03 | 0.02, 0.03 | 0.02, 0.03 | 0.03, 0.06 | 0.03, 0.06 | 0.06, 0.17  | 0.08, 0.21 |

Table S5: Range of average  $\alpha$  (-) for litterbag replicates grouped by species and study as estimated by all models (see Tab. S1). Ranges were computed on average estimates and therefore do not consider the uncertainty of decomposition rates for individual litterbag replicates.

| Taxon                                       | Study                            | Sample size | $\alpha$ (-) |           |             |            |           |              |              |              |
|---------------------------------------------|----------------------------------|-------------|--------------|-----------|-------------|------------|-----------|--------------|--------------|--------------|
|                                             |                                  |             | model 1-1    | model 1-2 | model 1-3   | model 1-4  | model 2-1 | model 2-2    | model 2-3    | model 2-4    |
| <i>S. angustifolium</i>                     | Bengtsson et al. (2017)          | 10          |              |           | 1.87, 1.94  |            |           |              | 2.63, 2.97   |              |
|                                             | Golovatskaya and Nikonova (2017) | 2           |              |           | 1.96, 2.02  | 2.44, 2.54 |           |              | 3.87, 4.41   | 4.61, 5.3    |
|                                             | Mäkilä et al. (2018)             | 2           |              |           | 2.11, 2.12  | 2.88, 2.9  |           |              | 7.56, 8.2    | 8.37, 9.17   |
|                                             | Straková et al. (2010)           | 9           |              |           | 1.94, 1.98  | 2.49, 2.58 |           |              | 4.82, 5.93   | 5.28, 6.64   |
|                                             | Vitt (1990)                      | 1           |              |           | 2.12, 2.12  | 2.93, 2.93 |           |              | 7.77, 7.77   | 8.82, 8.82   |
| <i>S. auriculatum</i>                       | Trinder et al. (2008)            | 3           |              |           | 2.21, 2.21  | 3, 3.01    |           |              | 11.41, 11.46 | 15.03, 15.2  |
| <i>S. balticum</i>                          | Bengtsson et al. (2017)          | 9           |              |           | 2.02, 2.11  |            |           |              | 5.36, 7.14   |              |
|                                             | Breeuwer et al. (2008)           | 8           |              |           | 2.18, 2.19  | 2.99, 3.02 |           |              | 17.78, 25.05 | 19.07, 27.31 |
|                                             | Mäkilä et al. (2018)             | 2           |              |           | 2.19, 2.2   | 3.06, 3.07 |           |              | 14.42, 16.4  | 15.56, 17.63 |
|                                             | Straková et al. (2010)           | 2           |              |           | 2.17, 2.18  | 3, 3.02    |           |              | 14.32, 17.86 | 15.65, 19.85 |
| <i>S. capillifolium</i>                     | Bengtsson et al. (2017)          | 10          |              |           | 2.22, 2.24  |            |           | 9.53, 12.98  |              |              |
| <i>S. contortum</i>                         | Bengtsson et al. (2017)          | 6           |              |           | 2.24, 2.24  |            |           | 9.33, 10.16  |              |              |
| <i>S. cuspidatum</i>                        | Bengtsson et al. (2017)          | 10          |              |           | 1.66, 1.74  |            |           | 3.44, 4.34   |              |              |
|                                             | Johnson and Damman (1991)        | 5           |              |           | 1.97, 1.97  | 3.1, 3.15  |           |              | 12.8, 18.58  | 13.4, 19.36  |
| <i>S. fallax</i>                            | Bengtsson et al. (2017)          | 10          |              |           | 1.98, 2.11  |            |           | 3.27, 4.16   |              |              |
|                                             | Straková et al. (2010)           | 4           |              |           | 2.13, 2.15  | 2.83, 2.88 |           |              | 6.27, 7.87   | 7.98, 9.86   |
| <i>S. fuscum</i>                            | Asada and Warner (2005)          | 8           |              |           | 2.2, 2.21   | 2.96, 2.99 |           |              | 14.93, 22.32 | 15.11, 22.54 |
|                                             | Bengtsson et al. (2017)          | 16          |              |           | 2.18, 2.19  |            |           | 20.22, 28.03 |              |              |
|                                             | Breeuwer et al. (2008)           | 8           |              |           | 2.19, 2.2   | 2.99, 3.01 |           |              | 30.73, 43.65 | 30.99, 44.18 |
|                                             | Golovatskaya and Nikonova (2017) | 2           |              |           | 2.09, 2.11  | 2.78, 2.81 |           |              | 25.92, 29.26 | 26.6, 30.05  |
|                                             | Johnson and Damman (1991)        | 5           |              |           | 2.2, 2.21   | 3, 3.02    |           |              | 34.47, 39.11 | 34.19, 38.88 |
|                                             | Mäkilä et al. (2018)             | 3           |              |           | 2.2, 2.21   | 2.99, 3.01 |           |              | 22.44, 25.95 | 22.59, 26.11 |
|                                             | Straková et al. (2010)           | 3           |              |           | 2.17, 2.19  | 2.92, 2.96 |           |              | 17.84, 21.85 | 18.06, 21.95 |
|                                             | Szumigalski and Bayley (1996)    | 1           |              |           | 2.19, 2.19  | 2.96, 2.96 |           |              | 23.08, 23.08 | 23.24, 23.24 |
|                                             | Thormann et al. (2001)           | 1           |              |           | 2.18, 2.18  | 2.95, 2.95 |           |              | 16.42, 16.42 | 16.73, 16.73 |
|                                             | Vitt (1990)                      | 1           |              |           | 2.21, 2.21  | 3.02, 3.02 |           |              | 28.54, 28.54 | 28.95, 28.95 |
| <i>S. girgensohnii</i>                      | Bengtsson et al. (2017)          | 9           |              |           | 2.13, 2.22  |            |           | 4.77, 6.45   |              |              |
| <i>S. lindbergii</i>                        | Bartsch and Moore (1985)         | 2           |              |           | 2.21, 2.22  | 3.01, 3.01 |           |              | 11.69, 12.14 | 16.6, 17.55  |
|                                             | Bengtsson et al. (2017)          | 10          |              |           | 2.19, 2.23  |            |           | 7.16, 9.03   |              |              |
| <i>S. magellanicum aggr.</i>                | Bengtsson et al. (2017)          | 27          |              |           | 2.12, 2.15  |            |           | 8.33, 11.24  |              |              |
|                                             | Mäkilä et al. (2018)             | 3           |              |           | 2.21, 2.22  | 3.03, 3.04 |           |              | 16.22, 20.47 | 14.95, 18.52 |
|                                             | Straková et al. (2010)           | 3           |              |           | 2.11, 2.12  | 2.78, 2.81 |           |              | 9.77, 11     | 8.78, 9.82   |
|                                             | Vitt (1990)                      | 1           |              |           | 2.2, 2.2    | 3, 3       |           |              | 14.54, 14.54 | 13.63, 13.63 |
| <i>S. majus</i>                             | Bengtsson et al. (2017)          | 8           |              |           | 1.72, 1.78  |            |           | 3.06, 3.68   |              |              |
|                                             | Mäkilä et al. (2018)             | 2           |              |           | 1.98, 1.99  | 3.03, 3.06 |           |              | 8.89, 9.32   | 13.34, 14.53 |
| <i>S. papillosum</i>                        | Bengtsson et al. (2017)          | 10          |              |           | 2.17, 2.21  |            |           | 7.69, 10.28  |              |              |
|                                             | Scheffer et al. (2001)           | 2           |              |           | 2.22, 2.22  | 2.98, 2.99 |           |              | 15.83, 16.39 | 18.4, 18.74  |
|                                             | Straková et al. (2010)           | 4           |              |           | 2.19, 2.21  | 2.89, 2.93 |           |              | 12.56, 15.67 | 12.54, 15.47 |
| <i>S. rubellum</i>                          | Bengtsson et al. (2017)          | 10          |              |           | 1.88, 1.92  |            |           | 4.24, 4.79   |              |              |
|                                             | Mäkilä et al. (2018)             | 2           |              |           | 2.11, 2.11  | 3.07, 3.07 |           |              | 10.61, 11.04 | 12.18, 12.6  |
| <i>S. russowii</i>                          | Straková et al. (2010)           | 3           |              |           | 2.14, 2.18  | 2.84, 2.9  |           | 8.47, 10.66  | 8.07, 9.91   |              |
| <i>S. russowii</i> and <i>capillifolium</i> | Hagemann and Moroni (2015)       | 18          |              |           | 8.42, 10.63 | 9.2, 11.84 |           | 11.51, 14.48 | 11.59, 14.58 |              |
| <i>S. squarrosum</i>                        | Scheffer et al. (2001)           | 2           |              |           | 2.21, 2.22  | 3.02, 3.02 |           | 14.16, 14.28 | 16.37, 16.7  |              |
| <i>S. tenellum</i>                          | Bengtsson et al. (2017)          | 9           |              |           | 1.98, 2.05  |            |           | 4.15, 5.33   |              |              |
| <i>S. teres</i>                             | Szumigalski and Bayley (1996)    | 1           |              |           | 2.24, 2.24  | 3.07, 3.07 |           | 16.46, 16.46 | 15.73, 15.73 |              |
| <i>S. warnstorffii</i>                      | Bengtsson et al. (2017)          | 6           |              |           | 2.22, 2.23  |            |           | 10.62, 13.31 |              |              |
|                                             |                                  |             |              |           |             |            |           |              |              |              |
| <i>Sphagnum spec.</i>                       | Bartsch and Moore (1985)         | 6           |              |           | 2.21, 2.22  | 3, 3.03    |           | 10.66, 11.77 | 13.6, 15.34  |              |
|                                             | Prevost et al. (1997)            | 10          |              |           | 2.23, 2.25  | 3.07, 3.11 |           | 14.06, 16.38 | 16.17, 19.3  |              |

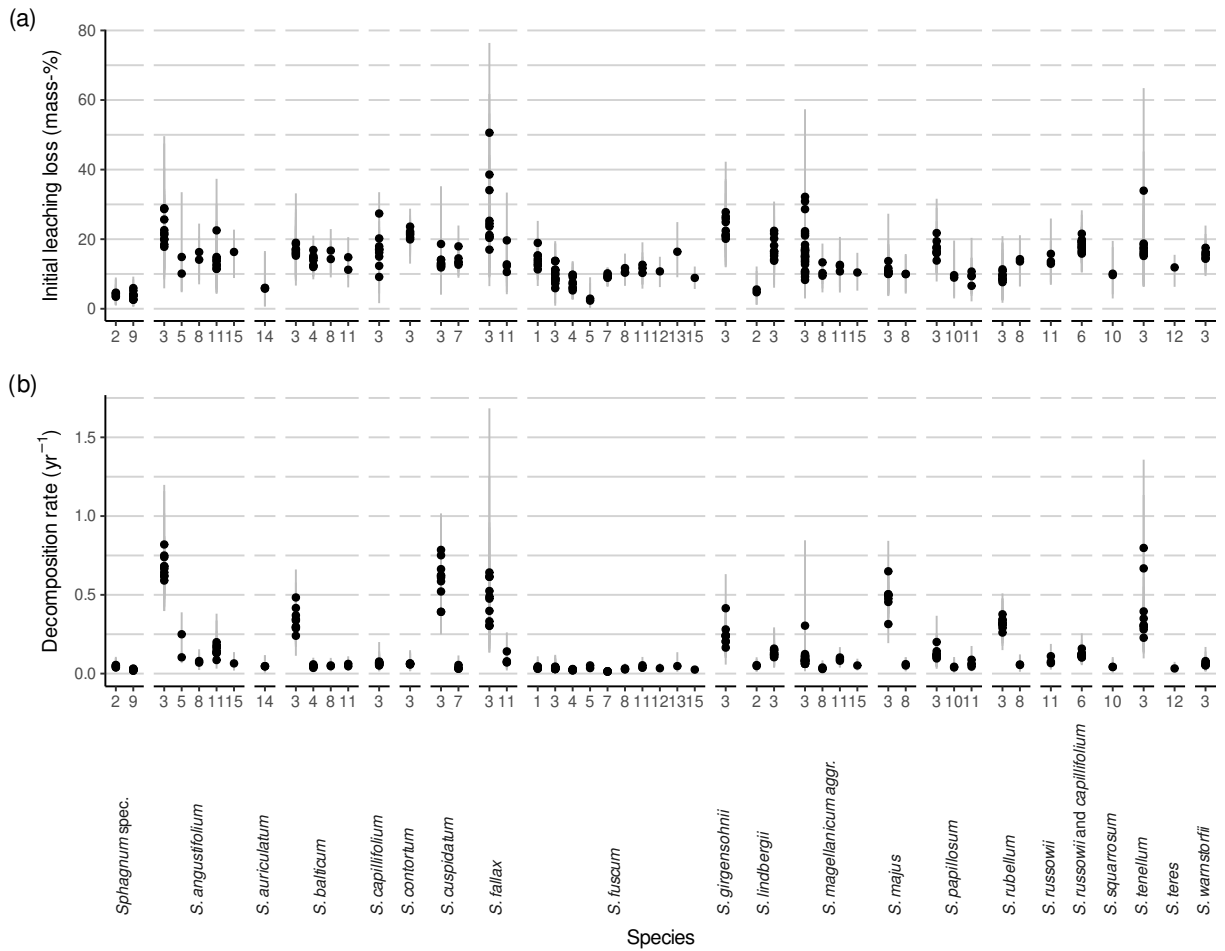

Figure S13: Estimated initial leaching losses (a), and decomposition rates (c) grouped by species and study for model 1-1. Points represent averages and error bars 95% confidence intervals. The study is indicated by numbers on the x axis: (1) Asada and Warner (2005), (2) Bartsch and Moore (1985), (3) Bengtsson et al. (2017), (4) Breeuwer et al. (2008), (5) Golovatskaya and Nikonova (2017), (6) Hagemann and Moroni (2015), (7) Johnson and Damman (1991), (8) Mäkilä et al. (2018), (9) Prevost et al. (1997), (10) Scheffer et al. (2001), (11) Straková et al. (2010), (12) Szumigalski and Bayley (1996), (13) Thormann et al. (2001), (14) Trinder et al. (2008), (15) Vitt (1990). *Sphagnum* spec. are samples that have been identified only to the genus level.

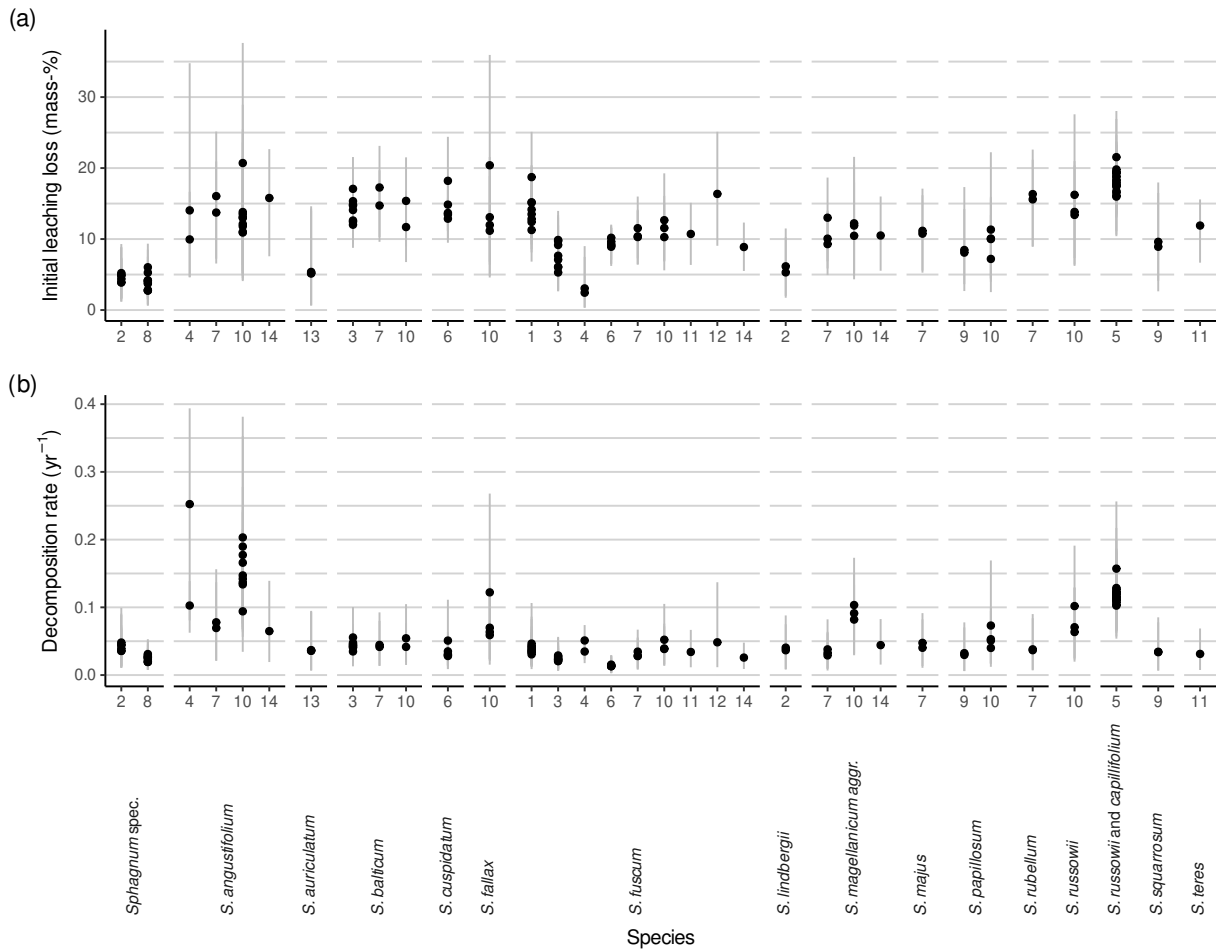

Figure S14: Estimated initial leaching losses (a), and decomposition rates (c) grouped by species and study for model 1-2. Points represent averages and error bars 95% confidence intervals. The study is indicated by numbers on the x axis: (1) Asada and Warner (2005), (2) Bartsch and Moore (1985), (3) Breeuwer et al. (2008), (4) Golovatskaya and Nikonova (2017), (5) Hagemann and Moroni (2015), (6) Johnson and Damman (1991), (7) Mäkilä et al. (2018), (8) Prevost et al. (1997), (9) Scheffer et al. (2001), (10) Straková et al. (2010), (11) Szumigalski and Bayley (1996), (12) Thormann et al. (2001), (13) Trinder et al. (2008), (14) Vitt (1990). *Sphagnum spec.* are samples that have been identified only to the genus level.



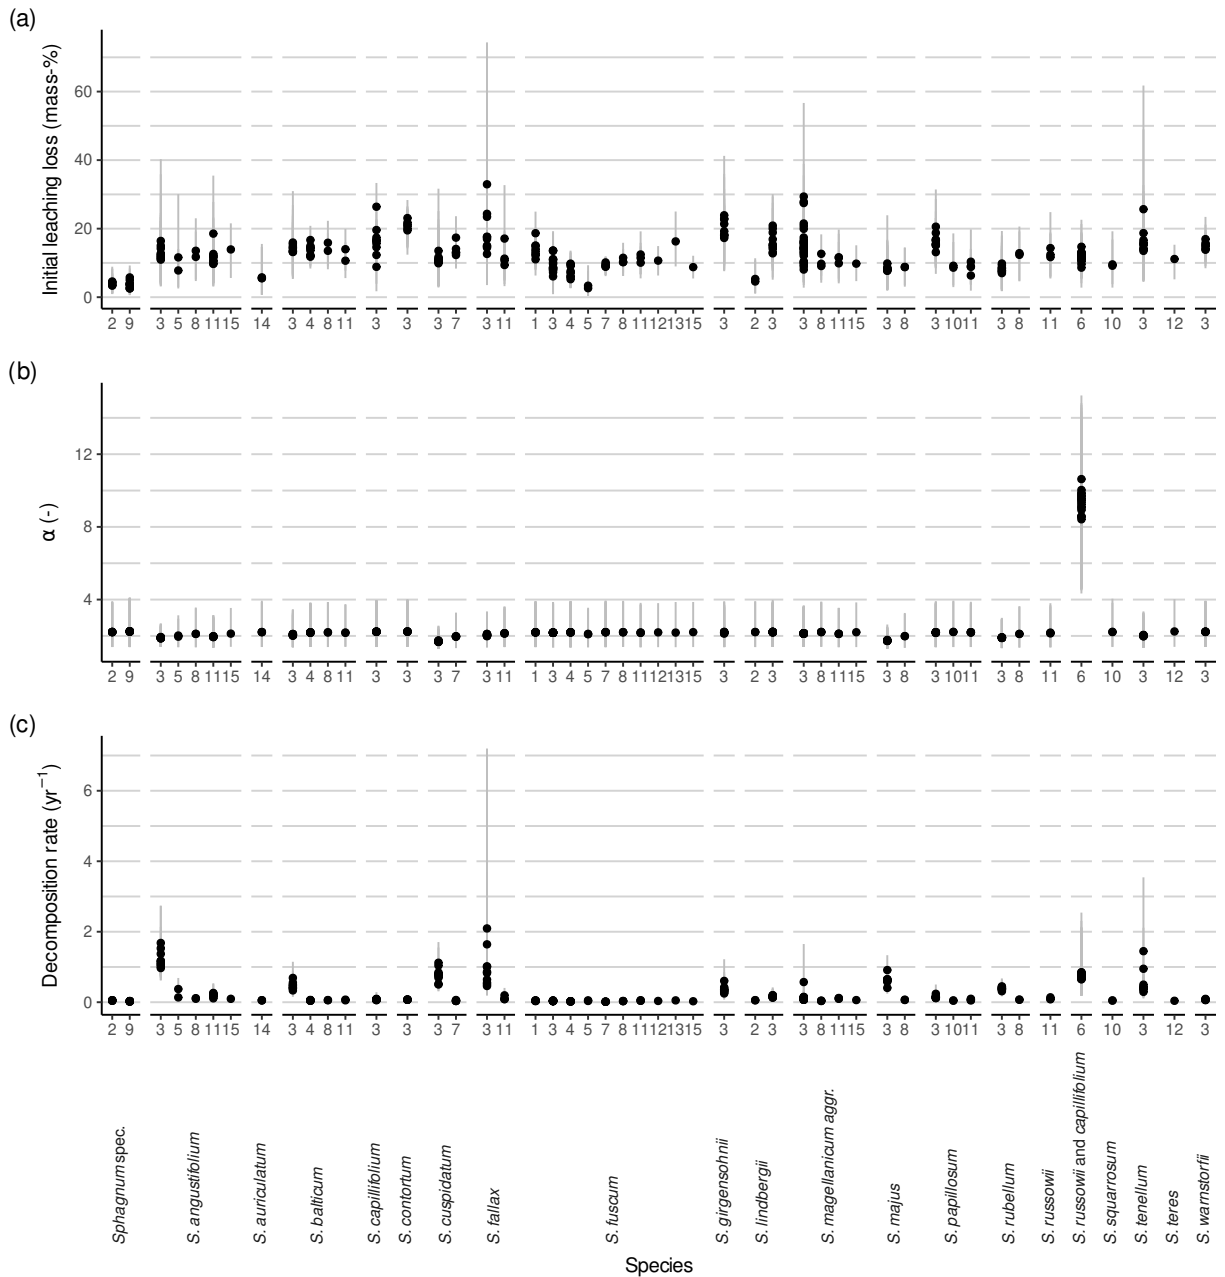

Figure S15: Estimated initial leaching losses (a), the parameter controlling a decrease of decomposition rates over time ( $\alpha$ ) (b), and decomposition rates (c) grouped by species and study for model 1-3. Points represent averages and error bars 95% confidence intervals. The study is indicated by numbers on the x axis: (1) Asada and Warner (2005), (2) Bartsch and Moore (1985), (3) Bengtsson et al. (2017), (4) Breeuwer et al. (2008), (5) Golovatskaya and Nikonova (2017), (6) Hagemann and Moroni (2015), (7) Johnson and Damman (1991), (8) Mäkilä et al. (2018), (9) Prevost et al. (1997), (10) Scheffer et al. (2001), (11) Straková et al. (2010), (12) Szumigalski and Bayley (1996), (13) Thormann et al. (2001), (14) Trinder et al. (2008), (15) Vitt (1990). *Sphagnum* spec. are samples that have been identified only to the genus level.

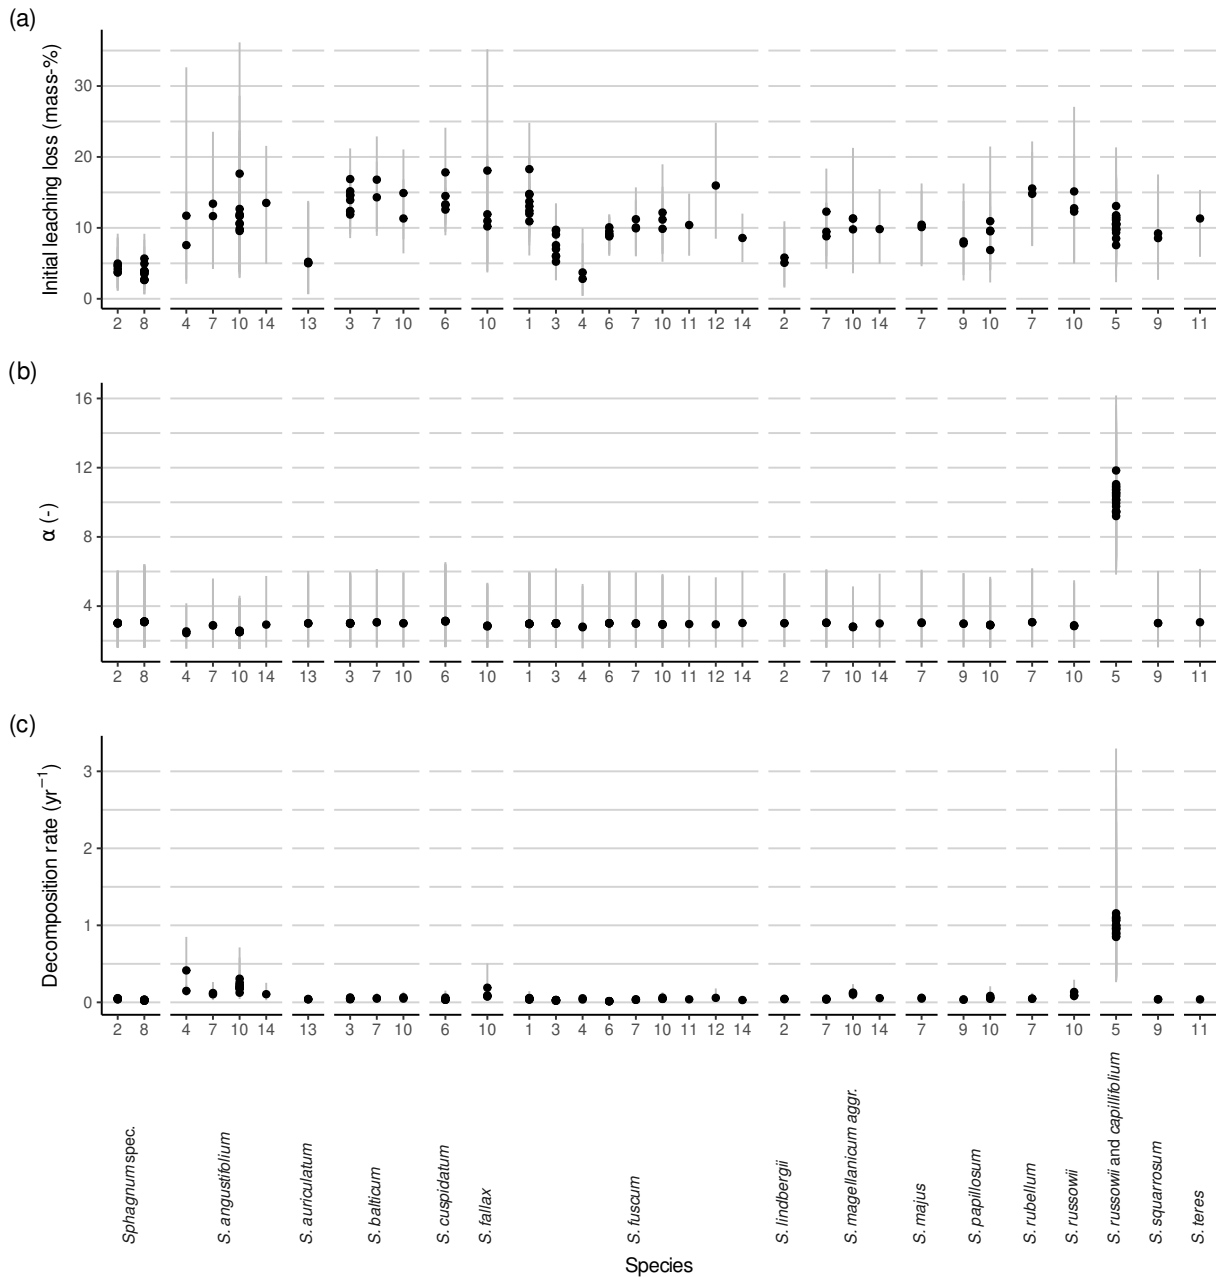

Figure S16: Estimated initial leaching losses (a), the parameter controlling a decrease of decomposition rates over time ( $\alpha$ ) (b), and decomposition rates (c) grouped by species and study for model 1-4. Points represent averages and error bars 95% confidence intervals. The study is indicated by numbers on the x axis: (1) Asada and Warner (2005), (2) Bartsch and Moore (1985), (3) Breeuwer et al. (2008), (4) Golovatskaya and Nikonova (2017), (5) Hagemann and Moroni (2015), (6) Johnson and Damman (1991), (7) Mäkilä et al. (2018), (8) Prevost et al. (1997), (9) Scheffer et al. (2001), (10) Straková et al. (2010), (11) Szumigalski and Bayley (1996), (12) Thormann et al. (2001), (13) Trinder et al. (2008), (14) Vitt (1990). *Sphagnum spec.* are samples that have been identified only to the genus level.

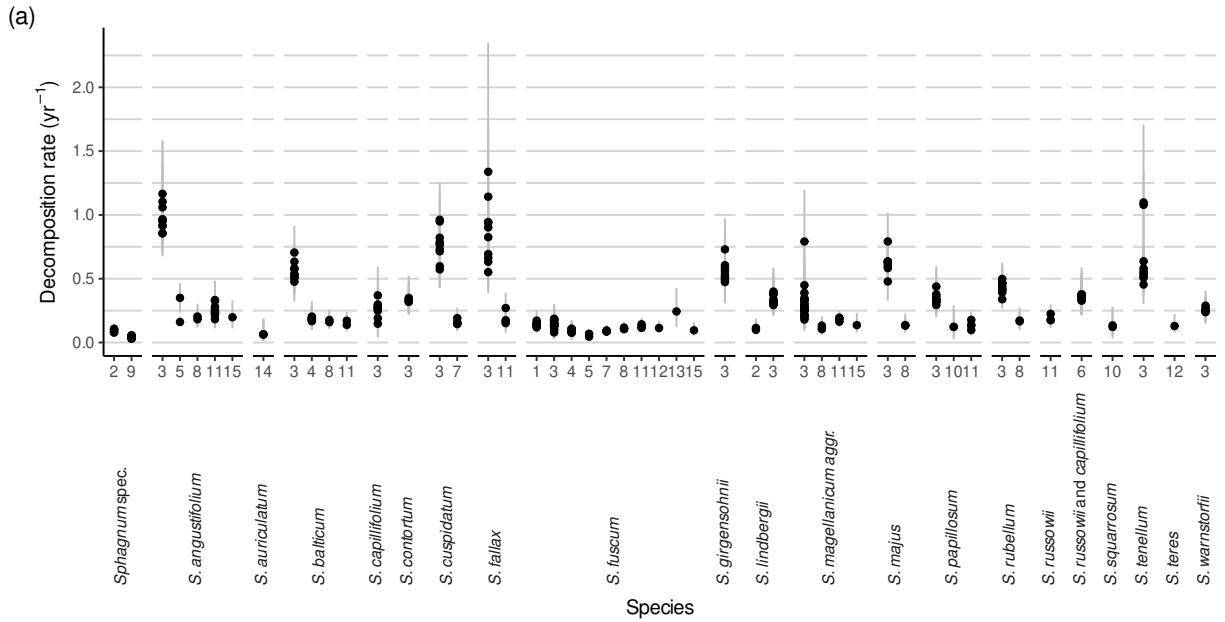

Figure S17: Estimated decomposition rates grouped by species and study for model 2-1. Points represent averages and error bars 95% confidence intervals. The study is indicated by numbers on the x axis: (1) Asada and Warner (2005), (2) Bartsch and Moore (1985), (3) Bengtsson et al. (2017), (4) Breeuwer et al. (2008), (5) Golovatskaya and Nikonova (2017), (6) Hagemann and Moroni (2015), (7) Johnson and Damman (1991), (8) Mäkilä et al. (2018), (9) Prevost et al. (1997), (10) Scheffer et al. (2001), (11) Straková et al. (2010), (12) Szumigalski and Bayley (1996), (13) Thormann et al. (2001), (14) Trinder et al. (2008), (15) Vitt (1990). *Sphagnum spec.* are samples that have been identified only to the genus level.

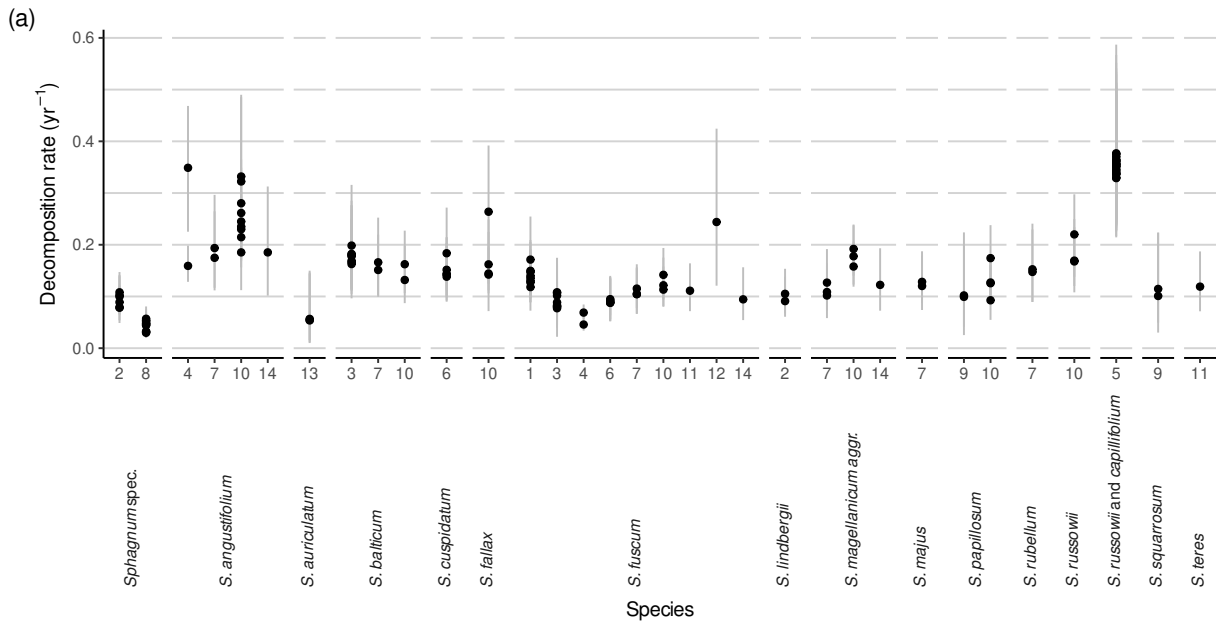

Figure S18: Estimated decomposition rates grouped by species and study for model 2-2. Points represent averages and error bars 95% confidence intervals. The study is indicated by numbers on the x axis: (1) Asada and Warner (2005), (2) Bartsch and Moore (1985), (3) Breeuwer et al. (2008), (4) Golovatskaya and Nikonova (2017), (5) Hagemann and Moroni (2015), (6) Johnson and Damman (1991), (7) Mäkilä et al. (2018), (8) Prevost et al. (1997), (9) Scheffer et al. (2001), (10) Straková et al. (2010), (11) Szumigalski and Bayley (1996), (12) Thormann et al. (2001), (13) Trinder et al. (2008), (14) Vitt (1990). *Sphagnum spec.* are samples that have been identified only to the genus level.

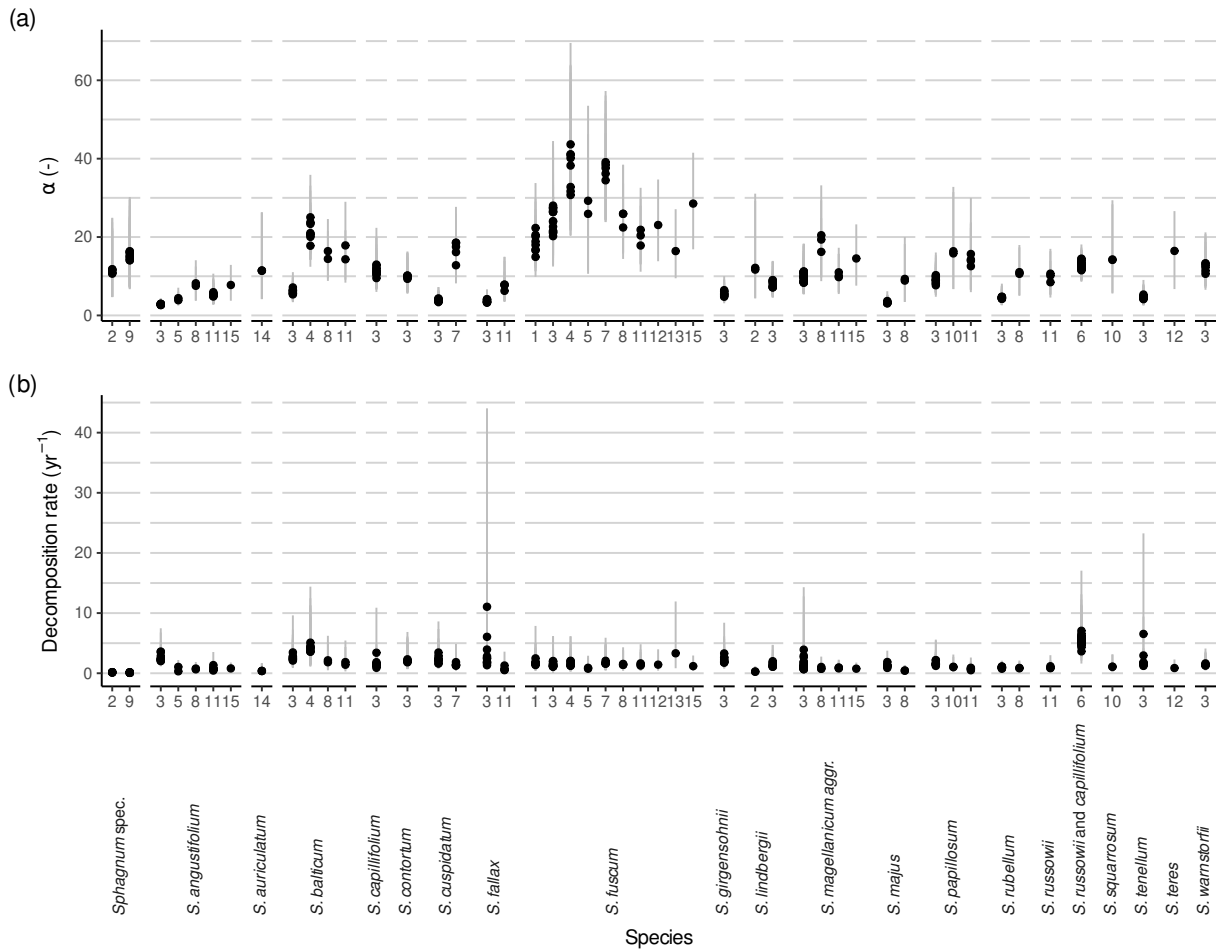

Figure S19: Estimated parameter controlling a decrease of decomposition rates over time ( $\alpha$ ) (a), and decomposition rates (b) grouped by species and study for model 2-3. Points represent averages and error bars 95% confidence intervals. The study is indicated by numbers on the x axis: (1) Asada and Warner (2005), (2) Bartsch and Moore (1985), (3) Bengtsson et al. (2017), (4) Breeuwer et al. (2008), (5) Golovatskaya and Nikonova (2017), (6) Hagemann and Moroni (2015), (7) Johnson and Damman (1991), (8) Mäkilä et al. (2018), (9) Prevost et al. (1997), (10) Scheffer et al. (2001), (11) Straková et al. (2010), (12) Szumigalski and Bayley (1996), (13) Thormann et al. (2001), (14) Trinder et al. (2008), (15) Vitt (1990). *Sphagnum spec.* are samples that have been identified only to the genus level.

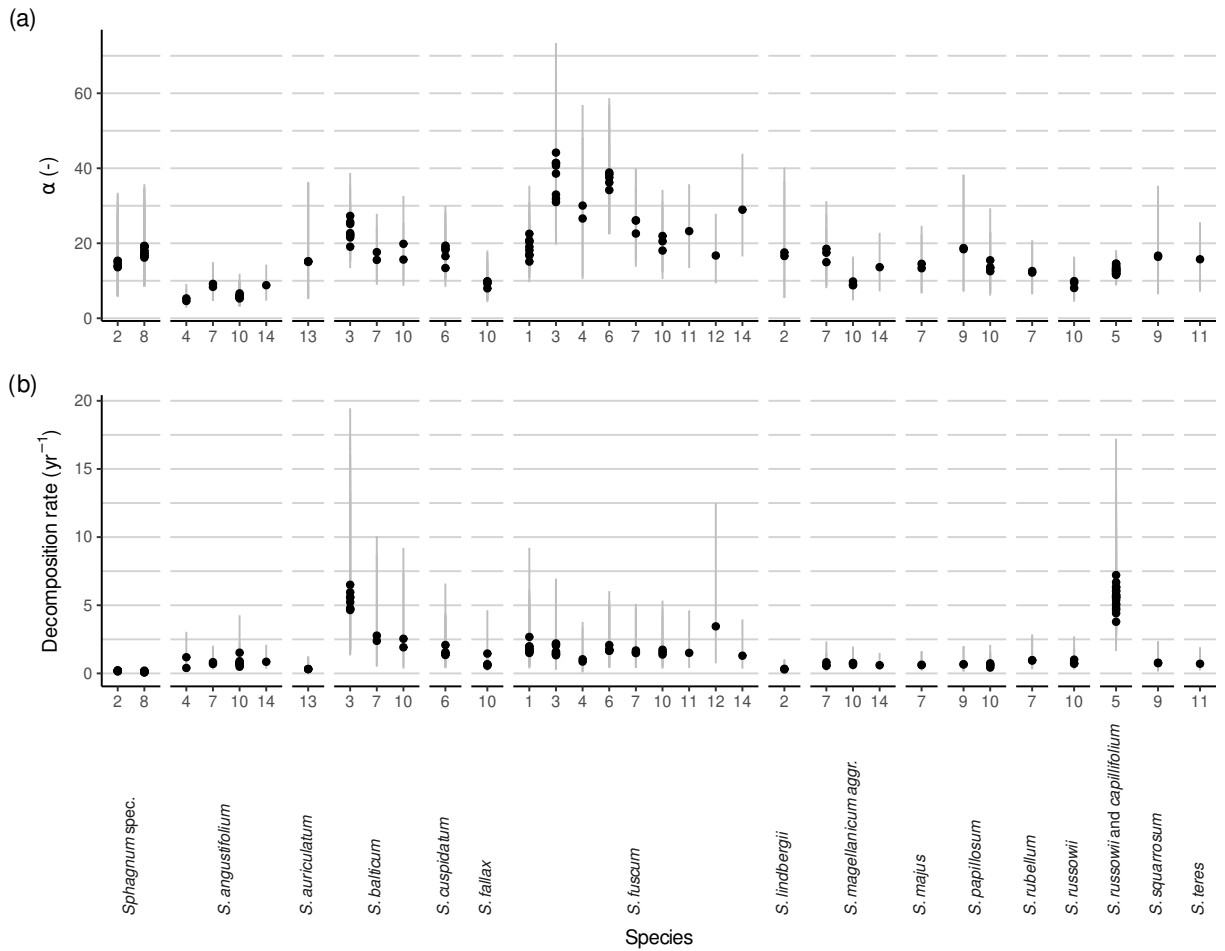

Figure S20: Estimated parameter controlling a decrease of decomposition rates over time ( $\alpha$ ) (a), and decomposition rates (b) grouped by species and study for model 2-4. Points represent averages and error bars 95% confidence intervals. The study is indicated by numbers on the x axis: (1) Asada and Warner (2005), (2) Bartsch and Moore (1985), (3) Breuwer et al. (2008), (4) Golovatskaya and Nikonova (2017), (5) Hagemann and Moroni (2015), (6) Johnson and Damman (1991), (7) Mäkilä et al. (2018), (8) Prevost et al. (1997), (9) Scheffer et al. (2001), (10) Straková et al. (2010), (11) Szumigalski and Bayley (1996), (12) Thormann et al. (2001), (13) Trinder et al. (2008), (14) Vitt (1990). *Sphagnum spec.* are samples that have been identified only to the genus level.

199  
200

# S11 Fit of all models to the remaining masses reported in the synthesized litterbag studies

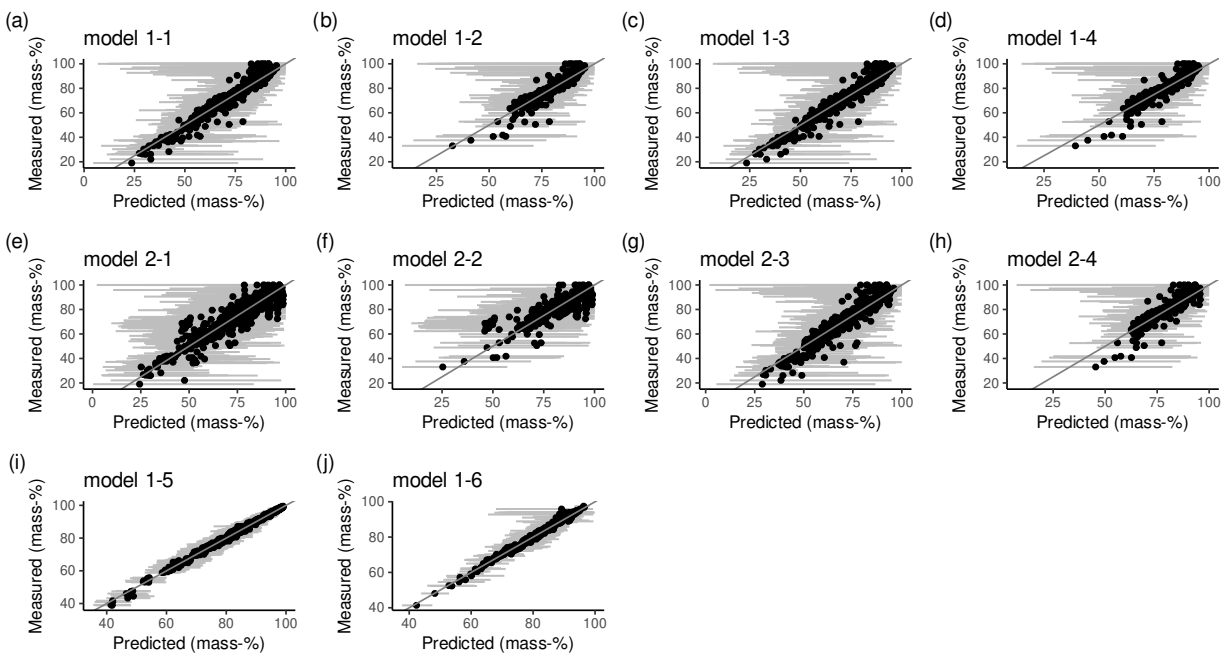

Figure S21: Measured versus predicted remaining masses in litterbag studies from all models computed in our study. Points are average values and error bars are 95% prediction intervals. For a description of each model, see Tab. S1.

201 **S12 Litterbag experiments with bad fit under model**  
 202 **1-3**

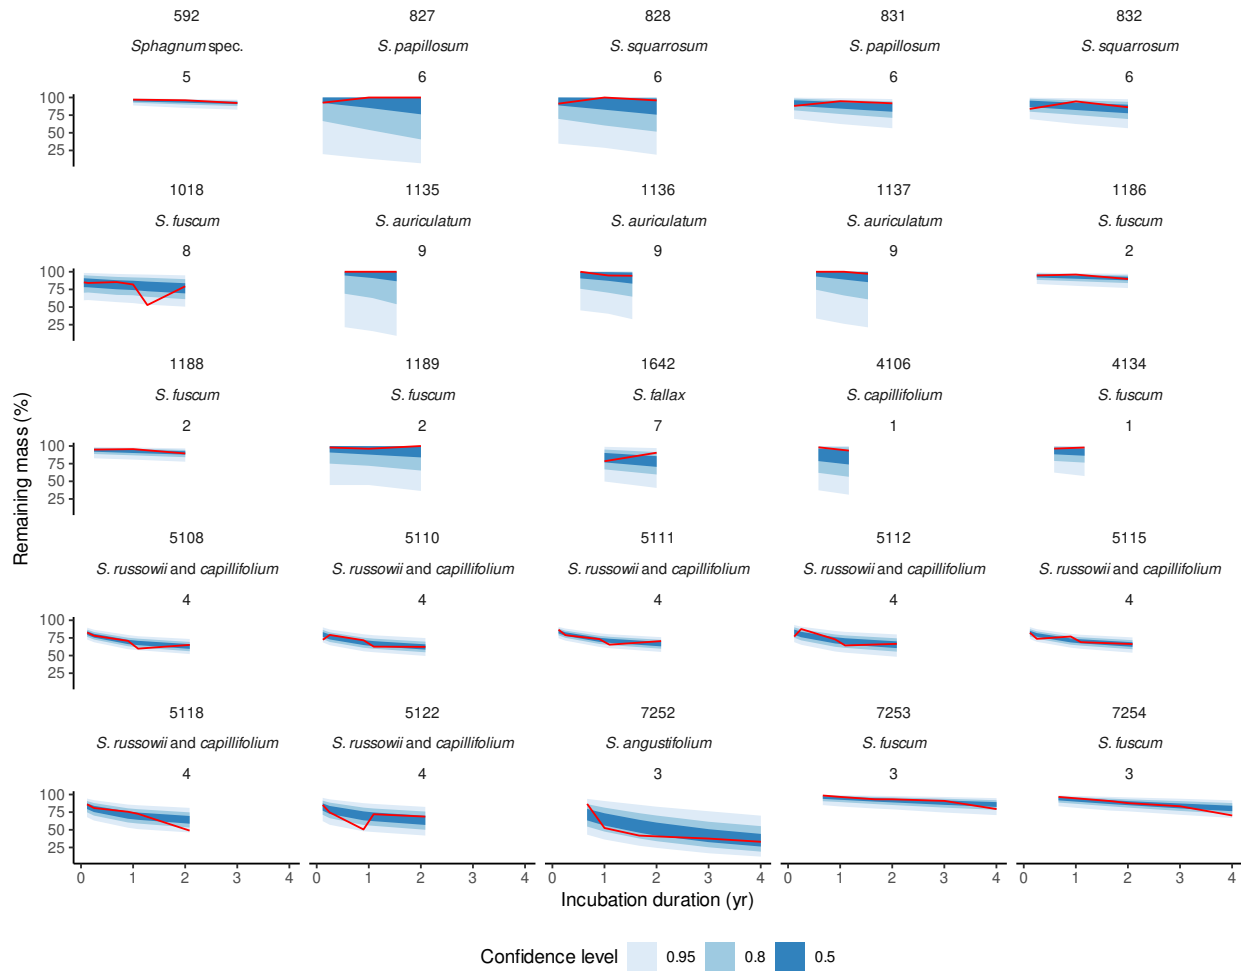

Figure S22: Remaining masses predicted by model 1-3 (shaded area) or as reported on average in available litterbag studies (red lines) during the litterbag experiments for outlier litterbag replicates. There is a panel for each litterbag replicate, identified by `id_sample_incubation_start` in the Peatland Decomposition Database (first row), the species (second row), and the study the data are from (third row). The studies are: (1) Bengtsson et al. (2017), (2) Breeuwer et al. (2008), (3) Golovatskaya and Nikonova (2017), (4) Hagemann and Moroni (2015), (5) Prevost et al. (1997), (6) Scheffer et al. (2001), (7) Straková et al. (2010), (8) Thormann et al. (2001), (9) Trinder et al. (2008). Outlier litterbag replicates are defined as those replicates where the average measured remaining mass significantly different from the average predicted remaining mass ( $\alpha = 0.99$ ).



203 **S13** Effects of considering or ignoring initial leaching  
 204 losses on decomposition rate estimates for model  
 205 1-1 versus model 2-1 and for all species

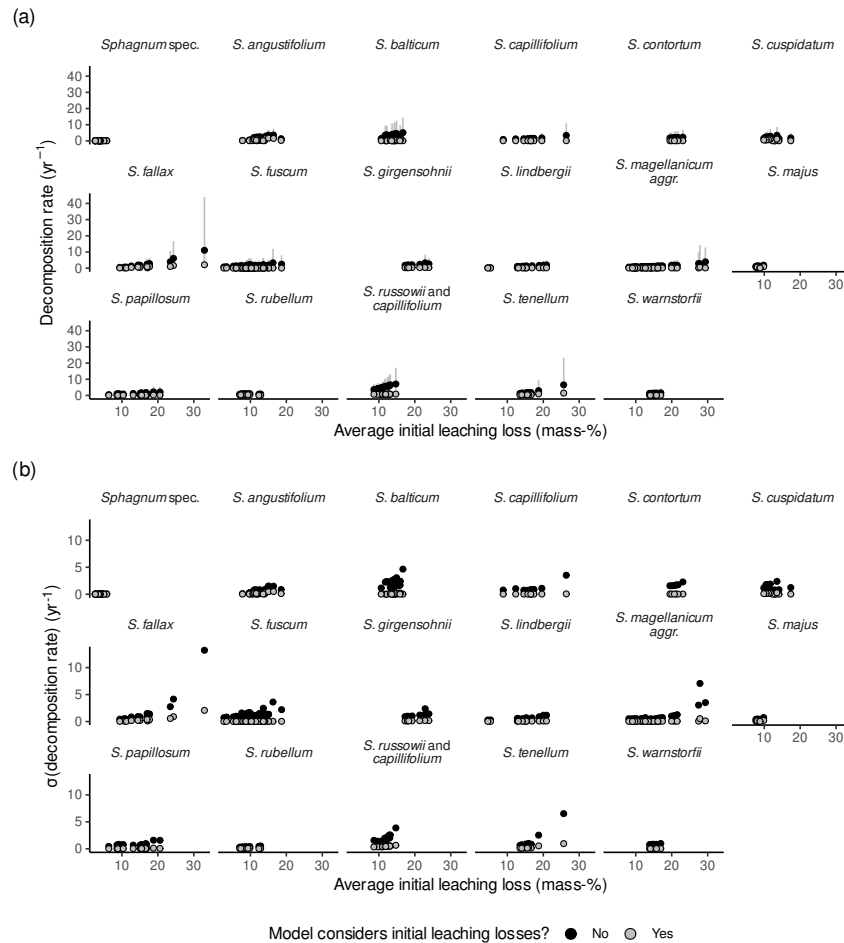

Figure S23: (a) Decomposition rate estimates, either considering leaching (black) or ignoring leaching (grey) versus average initial leaching losses estimated by the model considering initial leaching losses. Points are average estimates and error bars are 95% prediction intervals. (b) Standard deviation of decomposition rate estimates, either considering leaching (black) or ignoring leaching (grey) versus average initial leaching losses estimated by the model considering initial leaching losses.

206 **References**

207 Asada, T. and Warner, B. G.: Surface Peat Mass and Carbon Balance in a Hypermaritime  
 208 Peatland, Soil Science Society of America Journal, 69, 549–562, [https://doi.org/10.2136/](https://doi.org/10.2136/sssaj2005.0549)  
 209 sssaj2005.0549, 2005.

210 Bartsch, I. and Moore, T. R.: A preliminary investigation of primary production and de-  
211 composition in four peatlands near Schefferville, Québec, Canadian Journal of Botany, 63,  
212 1241–1248, <https://doi.org/10.1139/b85-171>, 1985.

213 Bengtsson, F., Granath, G., and Rydin, H.: Data from: Photosynthesis, growth, and de-  
214 cay traits in *Sphagnum* – a multispecies comparison, 83493 bytes, [https://doi.org/10.5061/](https://doi.org/10.5061/DRYAD.62054)  
215 DRYAD.62054, 2017.

216 Breeuwer, A., Heijmans, M., Robroek, B. J. M., Limpens, J., and Berendse, F.: The effect  
217 of increased temperature and nitrogen deposition on decomposition in bogs, Oikos, 117,  
218 1258–1268, <https://doi.org/10.1111/j.0030-1299.2008.16518.x>, 2008.

219 Bürkner, P.-C., Gabry, J., Kay, M., and Vehtari, A.: posterior: Tools for working with  
220 posterior distributions, 2023.

221 Froking, S., Roulet, N. T., Tuittila, E., Bubier, J. L., Quillet, A., Talbot, J., and Richard,  
222 P. J. H.: A new model of Holocene peatland net primary production, decomposition, water  
223 balance, and peat accumulation, Earth System Dynamics, 1, 1–21, [https://doi.org/10.5194/](https://doi.org/10.5194/esd-1-1-2010)  
224 esd-1-1-2010, 2010.

225 Gabry, J. and Mahr, T.: bayesplot: Plotting for bayesian models, 2022.

226 Golovatskaya, E. A. and Nikonova, L. G.: The influence of the bog water level on the  
227 transformation of sphagnum mosses in peat soils of oligotrophic bogs, Eurasian Soil Science,  
228 50, 580–588, <https://doi.org/10.1134/S1064229317030036>, 2017.

229 Hagemann, U. and Moroni, M. T.: Moss and lichen decomposition in old-growth and har-  
230 vested high-boreal forests estimated using the litterbag and minicontainer methods, Soil  
231 Biology and Biochemistry, 87, 10–24, <https://doi.org/10.1016/j.soilbio.2015.04.002>, 2015.

232 Johnson, L. C. and Damman, A. W. H.: Species-controlled *Sphagnum* decay on a south  
233 Swedish raised bog, Oikos, 61, 234, <https://doi.org/10.2307/3545341>, 1991.

234 Kay, M.: tidybayes: Tidy data and geoms for Bayesian models, [https://doi.org/10.5281/](https://doi.org/10.5281/zenodo.1308151)  
235 zenodo.1308151, 2022.

236 Mäkilä, M., Säävuori, H., Grundström, A., and Suomi, T.: *Sphagnum* decay patterns and  
237 bog microtopography in south-eastern Finland, Mires and Peat, 1–12, [https://doi.org/10.](https://doi.org/10.19189/MaP.2017.OMB.283)  
238 19189/MaP.2017.OMB.283, 2018.

239 Moore, T. R., Bubier, J. L., and Bledzki, L.: Litter decomposition in temperate peatland  
240 ecosystems: The effect of substrate and site, Ecosystems, 10, 949–963, [https://doi.org/10.](https://doi.org/10.1007/s10021-007-9064-5)  
241 1007/s10021-007-9064-5, 2007.

242 Pedersen, T. L.: patchwork: The composer of plots, 2020.

243 Prevost, M., Belleau, P., and Plamondon, A. P.: Substrate conditions in a treed peat-  
244 land: Responses to drainage, Écoscience, 4, 543–554, [https://doi.org/10.1080/11956860.](https://doi.org/10.1080/11956860.1997.11682434)  
245 1997.11682434, 1997.

246 R Core Team: R: A language and environment for statistical computing, Manual, R Foun-  
247 dation for Statistical Computing, Vienna, Austria, 2022.

248 Scheffer, R. A., Van Logtestijn, R. S. P., and Verhoeven, J. T. A.: Decomposition of *Carex*  
249 and *Sphagnum* litter in two mesotrophic fens differing in dominant plant species, Oikos, 92,  
250 44–54, <https://doi.org/10.1034/j.1600-0706.2001.920106.x>, 2001.

251 Straková, P., Anttila, J., Spetz, P., Kitunen, V., Tapanila, T., and Laiho, R.: Litter quality  
252 and its response to water level drawdown in boreal peatlands at plant species and community  
253 level, Plant and Soil, 335, 501–520, <https://doi.org/10.1007/s11104-010-0447-6>, 2010.

254 Szumigalski, A. R. and Bayley, S. E.: Decomposition along a bog to rich fen gradient in

255 central Alberta, Canada, *Canadian Journal of Botany*, 74, 573–581, <https://doi.org/10.1139/>  
256 b96-073, 1996.

257 Thormann, M. N., Bayley, S. E., and Currah, R. S.: Comparison of decomposition of be-  
258 lowground and aboveground plant litters in peatlands of boreal Alberta, Canada, *Canadian*  
259 *Journal of Botany*, 79, 9–22, <https://doi.org/10.1139/b00-138>, 2001.

260 Trinder, C. J., Johnson, D., and Artz, R. R. E.: Interactions among fungal community  
261 structure, litter decomposition and depth of water table in a cutover peatland, *FEMS Mi-*  
262 *crobiology Ecology*, 64, 433–448, <https://doi.org/10.1111/j.1574-6941.2008.00487.x>, 2008.

263 Vehtari, A., Gelman, A., Simpson, D., Carpenter, B., and Bürkner, P.-C.: Rank-  
264 Normalization, Folding, and Localization: An Improved  $\hat{R}$  for Assessing Convergence  
265 of MCMC (with Discussion), *Bayesian Analysis*, 16, <https://doi.org/10.1214/20-BA1221>,  
266 2021.

267 Vitt, D. H.: Growth and production dynamics of boreal mosses over climatic, chemical  
268 and topographic gradients, *Botanical Journal of the Linnean Society*, 104, 35–59, <https://doi.org/10.1111/j.1095-8339.1990.tb02210.x>, 1990.

270 Wickham, H.: *ggplot2: Elegant graphics for data analysis*, 2nd ed. 2016., Springer Interna-  
271 tional Publishing : Imprint: Springer, Cham, <https://doi.org/10.1007/978-3-319-24277-4>,  
272 2016.

273 Wickham, H., Averick, M., Bryan, J., Chang, W., McGowan, L., François, R., Grolemund,  
274 G., Hayes, A., Henry, L., Hester, J., Kuhn, M., Pedersen, T., Miller, E., Bache, S., Müller,  
275 K., Ooms, J., Robinson, D., Seidel, D., Spinu, V., Takahashi, K., Vaughan, D., Wilke, C.,  
276 Woo, K., and Yutani, H.: Welcome to the Tidyverse, *Journal of Open Source Software*, 4,  
277 1686, <https://doi.org/10.21105/joss.01686>, 2019.
